# Supplementary material
Source: PubMed Central journal article supplement (PMC3820949)

# Protein

gi|27377645|ref|NP\_769174.1|

# Peptide

AEQLNDRESSGLADK

10104.mgf\_PSM.mgf-41470 SEQ:AEQLNDRESSGLADK 0,\_N-Acetyl\_Protein\_42.010

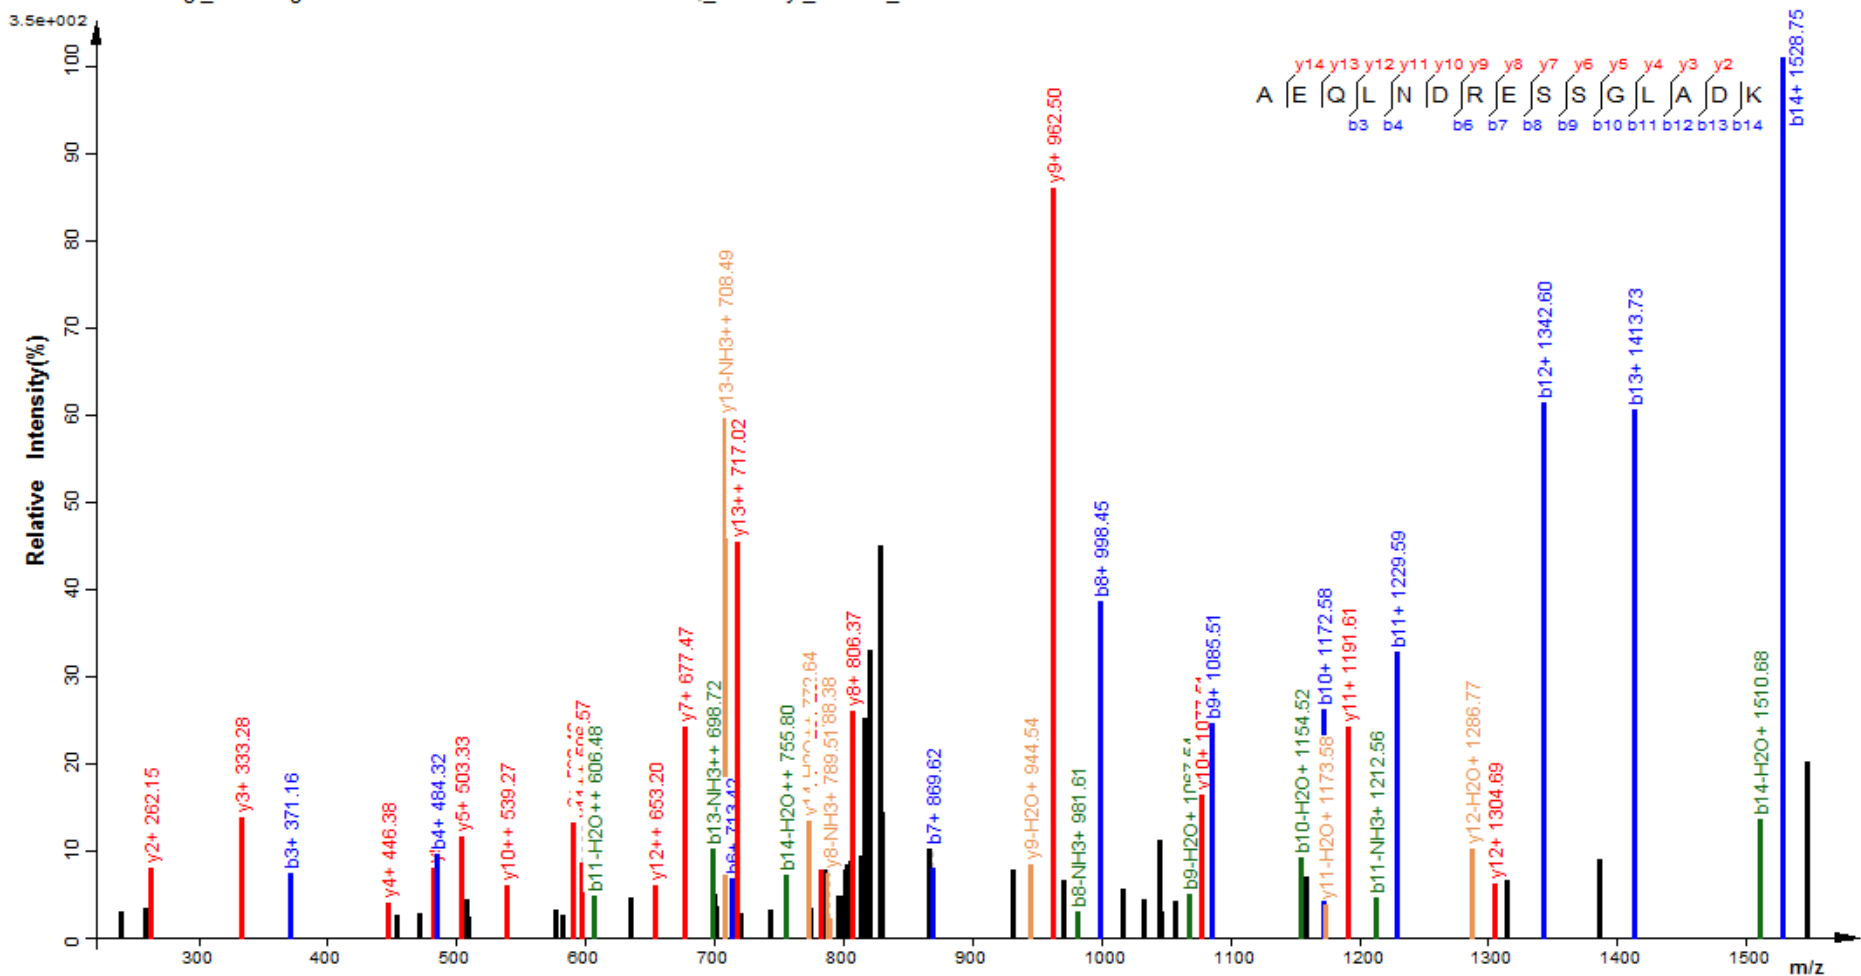

# Protein

gi|27380073|ref|NP\_771602.1|

# Peptide

AESIQLDQLSQLK

10099.mgf\_PSM.mgf-48970 SEQ:AESIQLDQLSQLK 0\_N-Acetyl\_Protein\_42.010

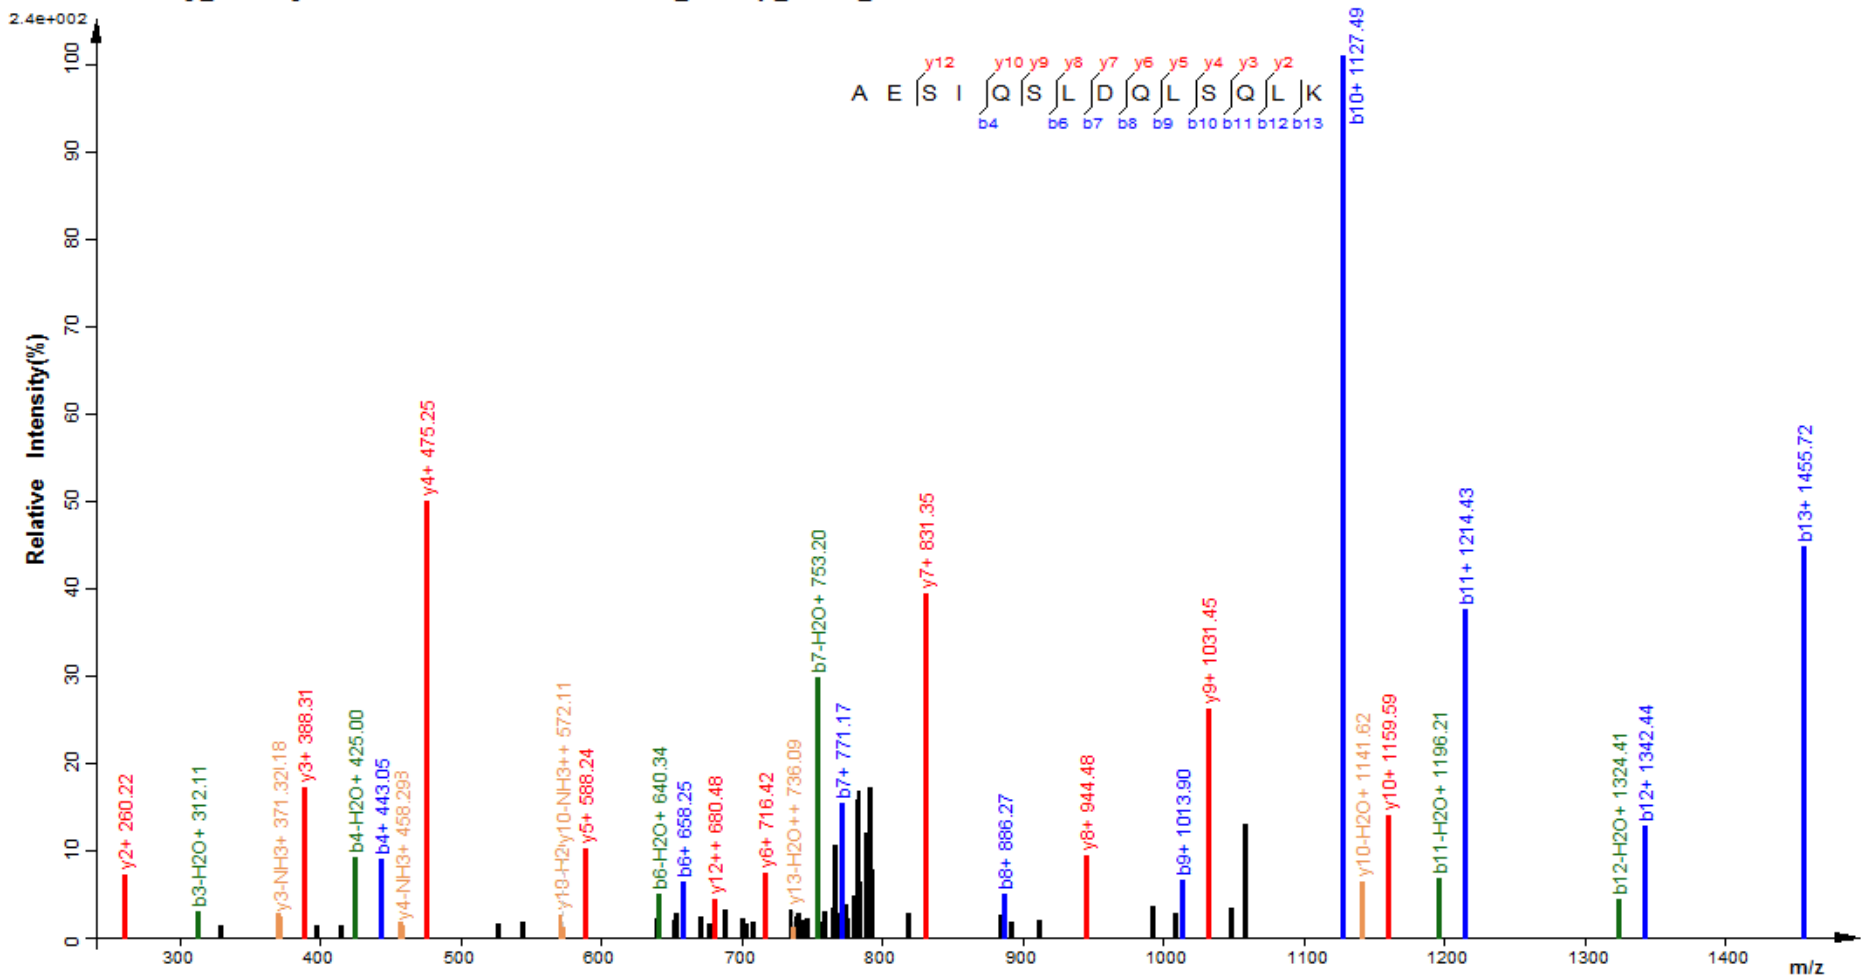

# Protein

gi|27378089|ref|NP\_769618.1|

# Peptide

GEGAAEEDDKAGK

10115.mgf\_PSM.mgf-11863 SEQ:GEGAAEEDDKAGK 0\_N-Acetyl\_Protein\_42.010

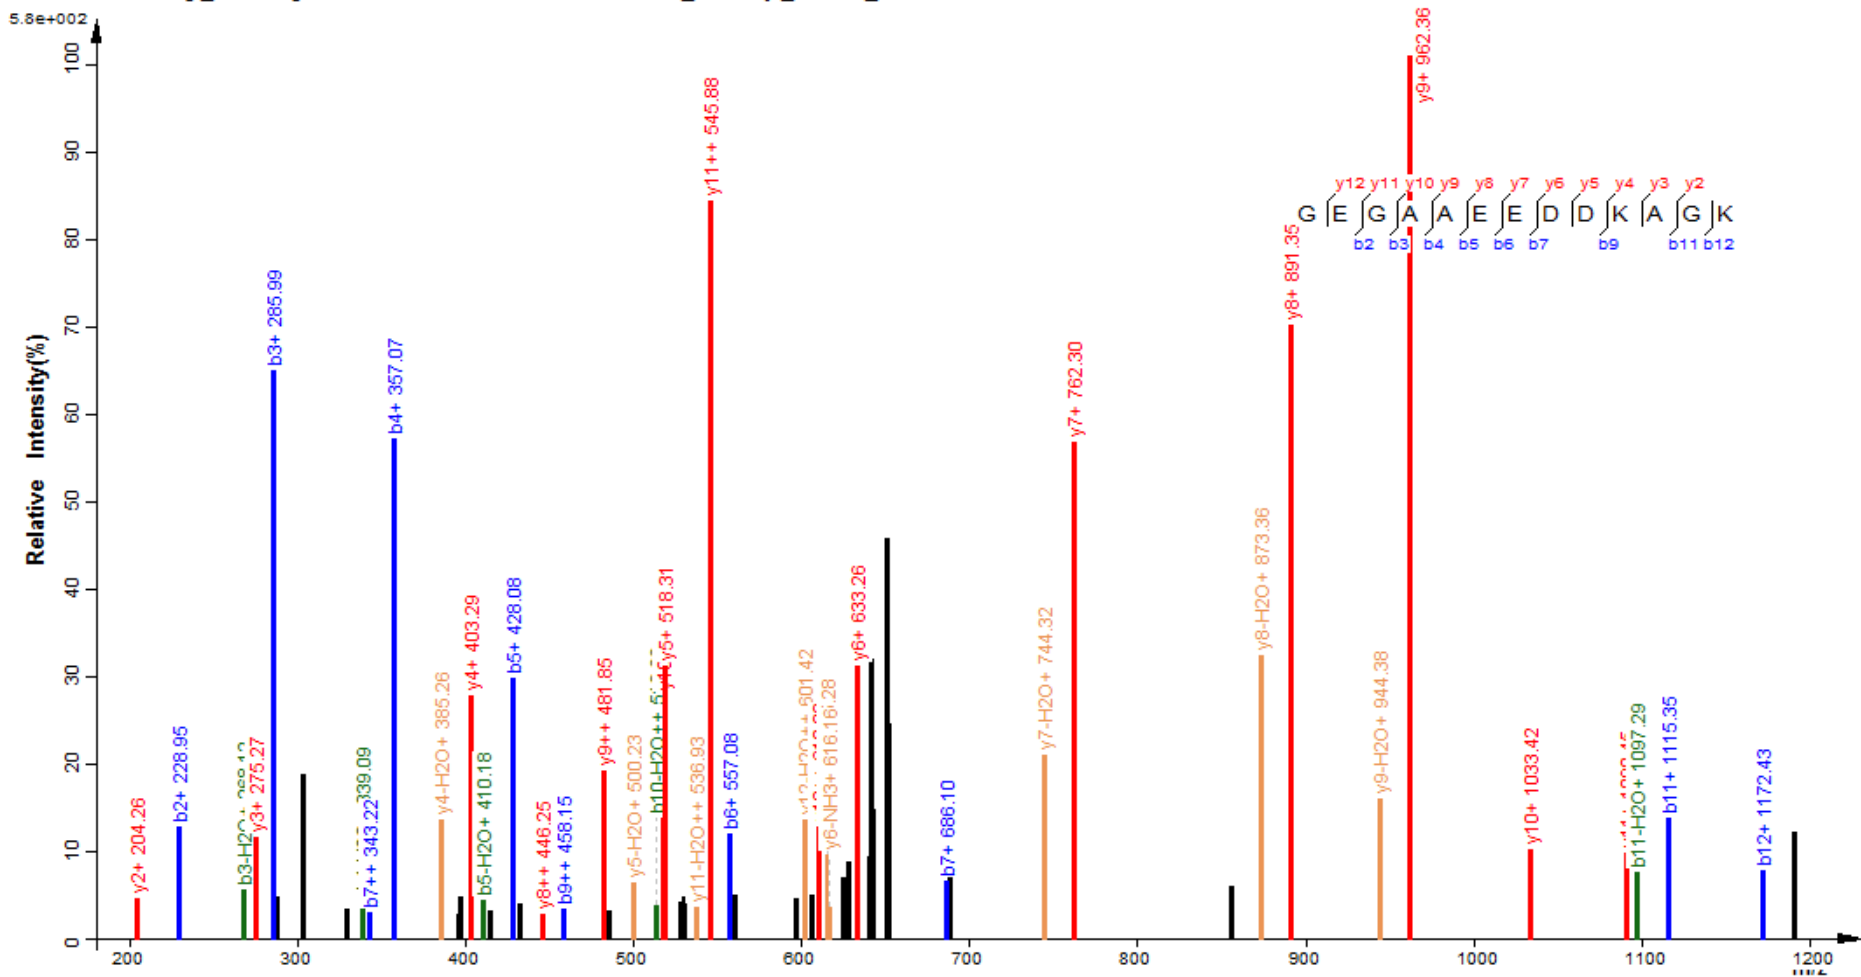

# Protein

gi|27379592|ref|NP\_771121.1|

# Peptide

SAEDTHGSAEVAAR

10103.mgf\_PSM.mgf-62265 SEQ:SAEDTHGSAEVAAR 0,\_N-Acetyl\_Protein\_42.010

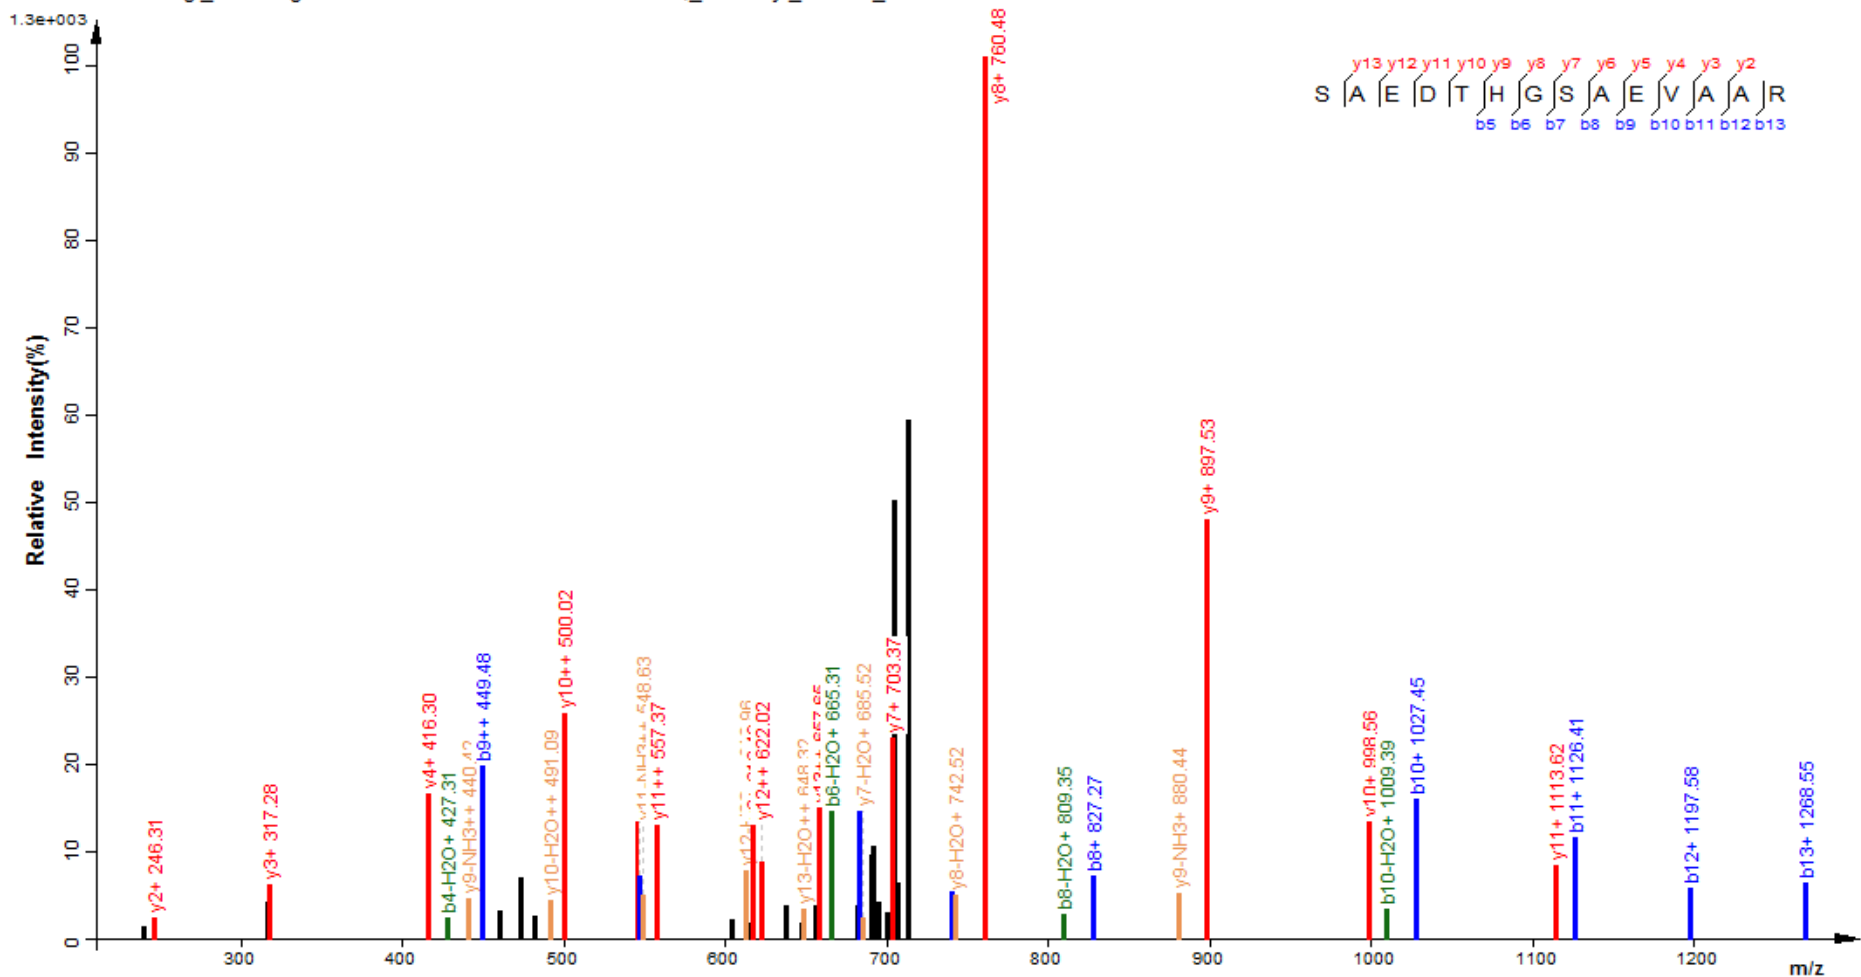

# Protein

gi|27378422|ref|NP\_769951.1|

# Peptide

SEISMNAASGVEGATQLR

10116PSM.mgf-31829 SEQ:SEISMNAASGVEGATQLR 0\_N-Acetyl\_Protein\_42.010 4\_Oxidation\_M\_15.995

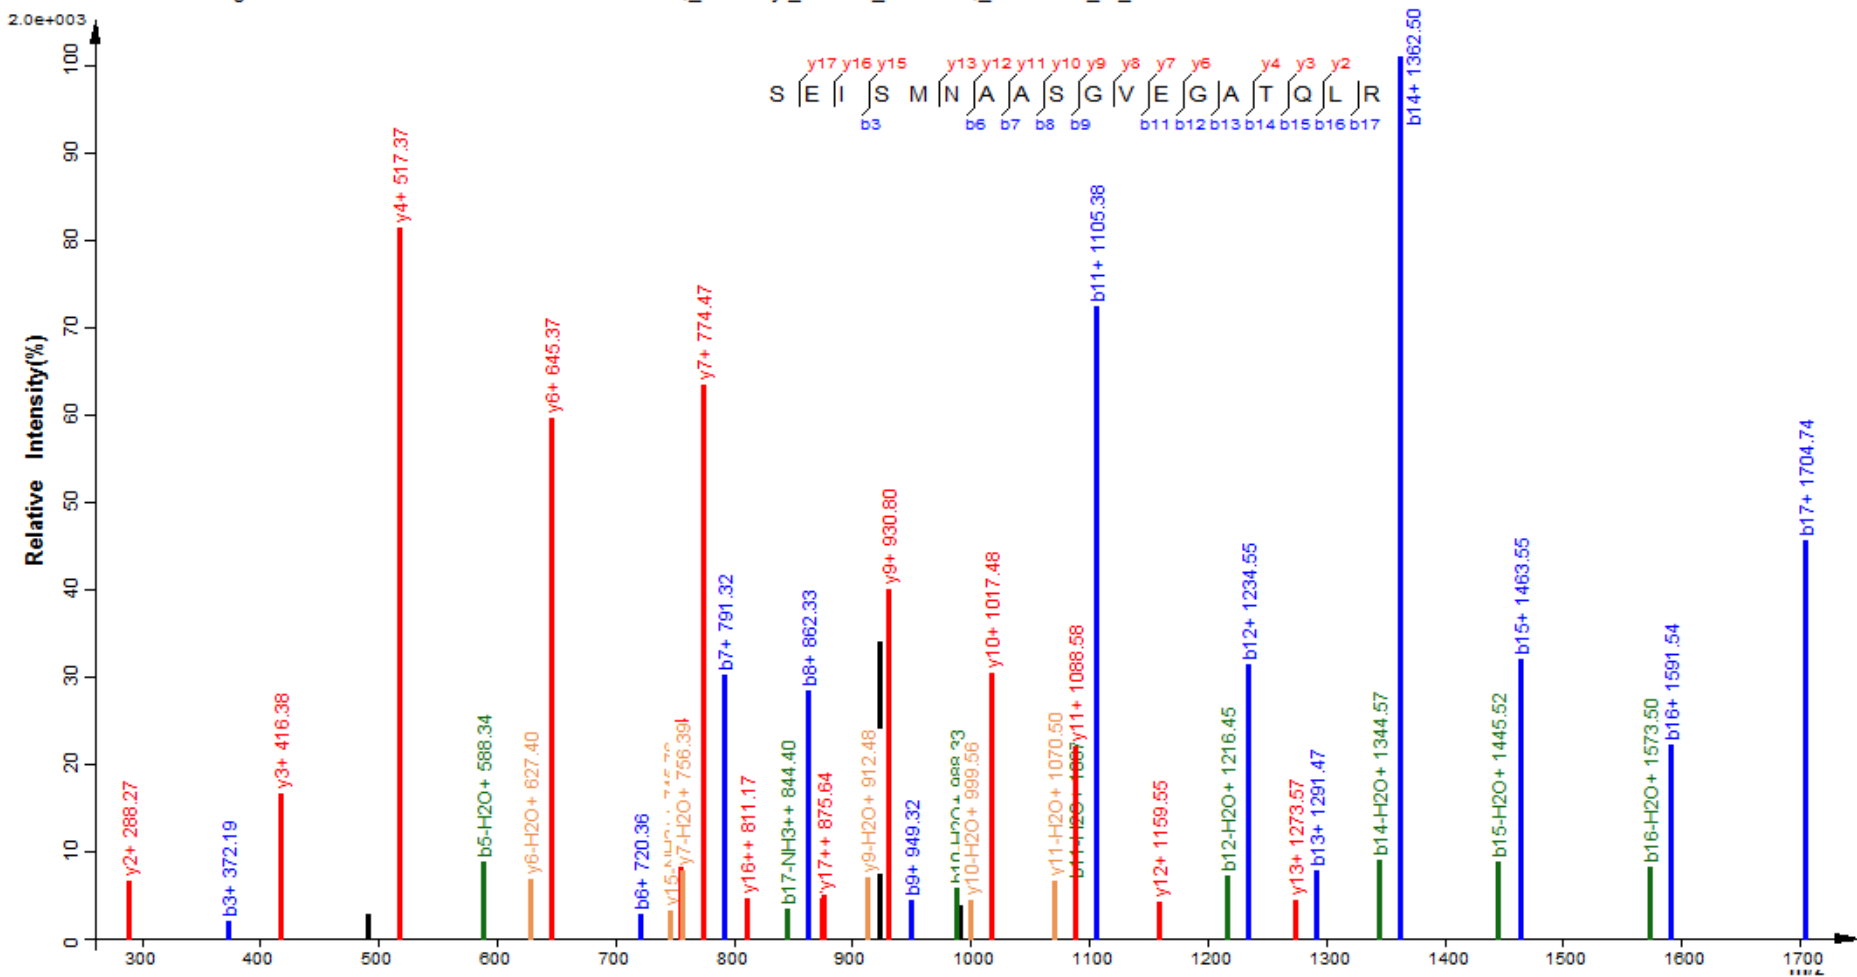

# Protein

gi|27379161|ref|NP\_770690.1|

# Peptide

SELFDEVDEEV

10103.mgf\_PSM.mgf-57069 SEQ:SELFDEVDEEV 0,\_N-Acetyl\_Protein\_42.010

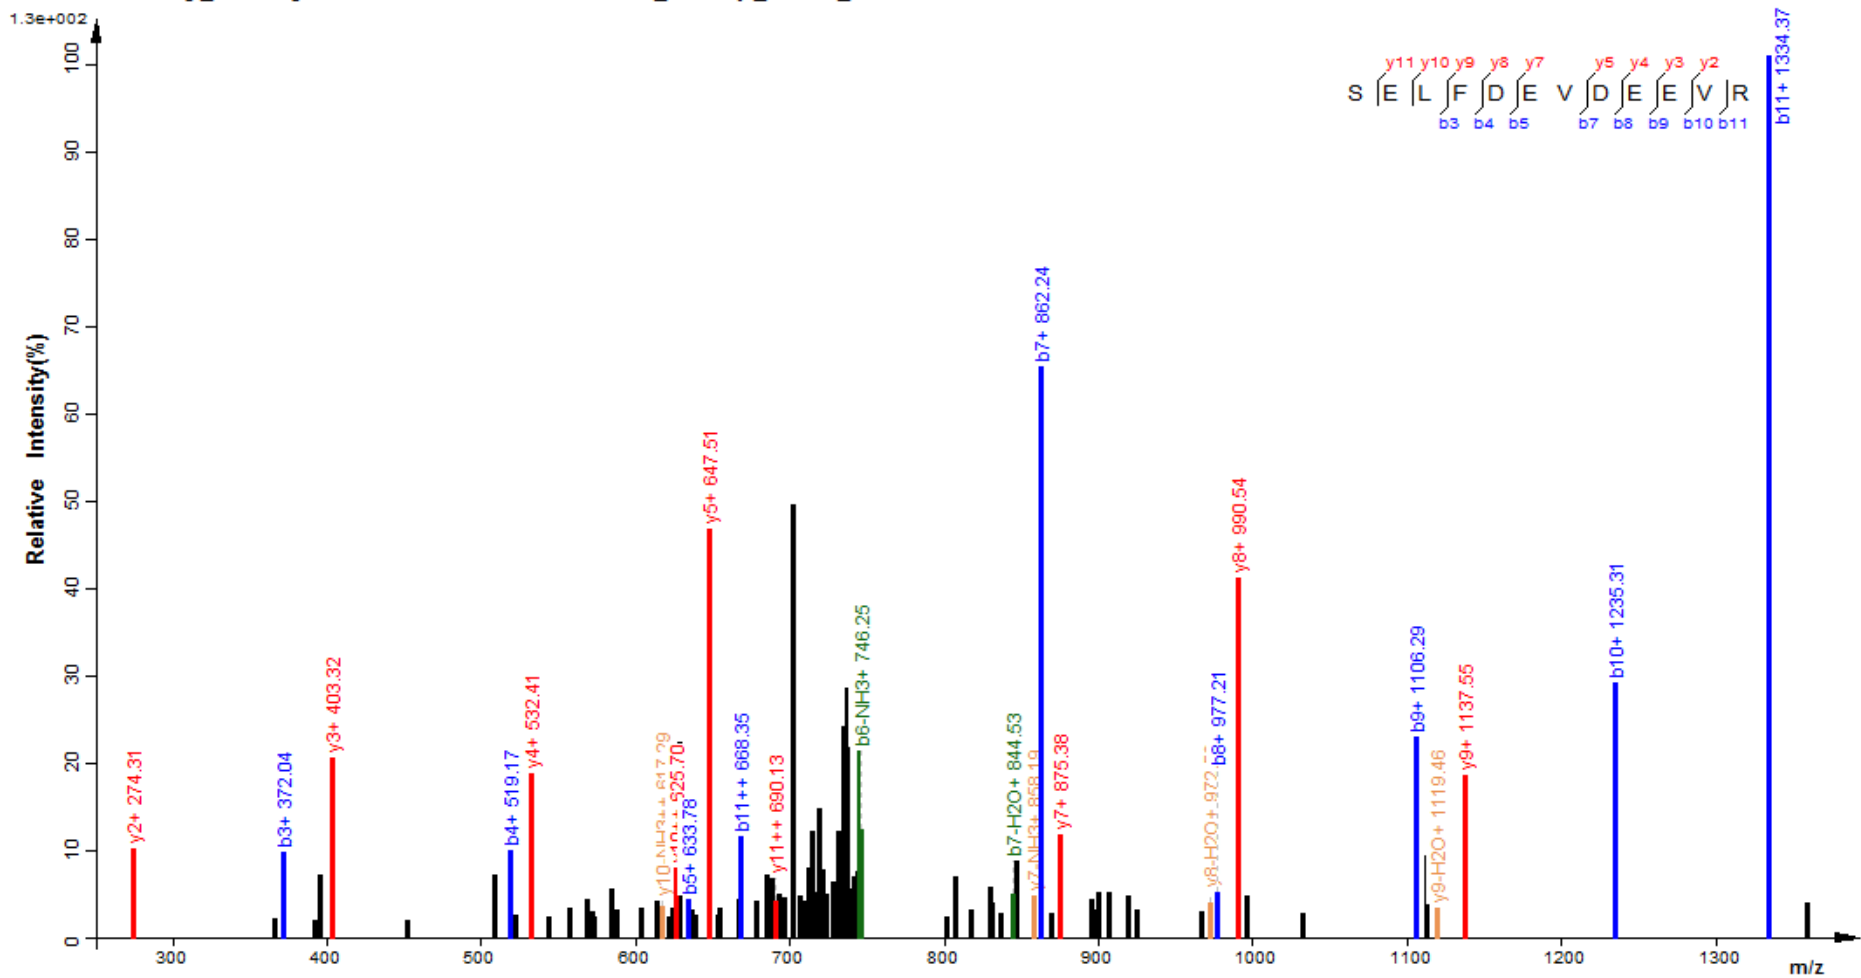

# Protein

gi|27376205|ref|NP\_767734.1|

# Peptide

SELSVMSAAGGLPQAPLLPEAPAK

10116PSM.mgf-29611 SEQ:SELSVMSAAGGLPQAPLLPEAPAK 0\_N-Acetyl\_Protein\_42.010 6\_Oxidation\_M\_15.995

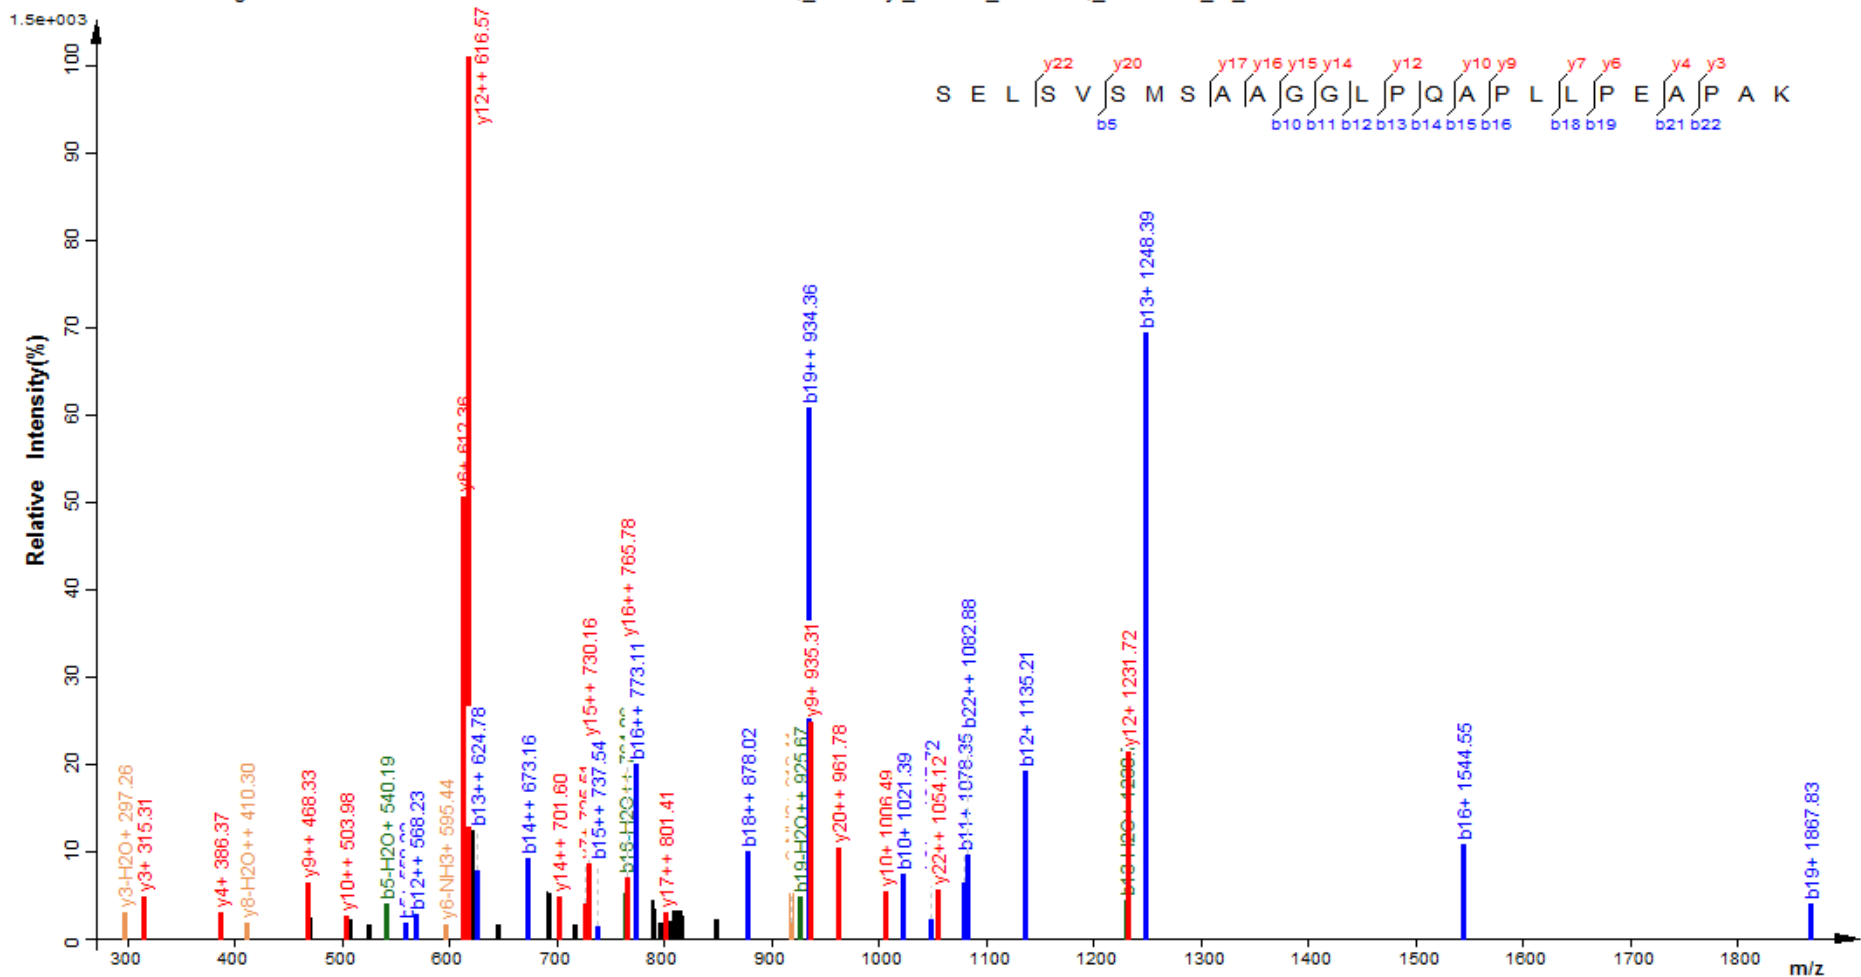

# Protein

gi|27376854|ref|NP\_768383.1|

# Peptide

SLATTNSVAEIR

10116PSM.mgf-72113 SEQ:SLATTNSVAEIR 0\_N-Acetyl\_Protein\_42.010

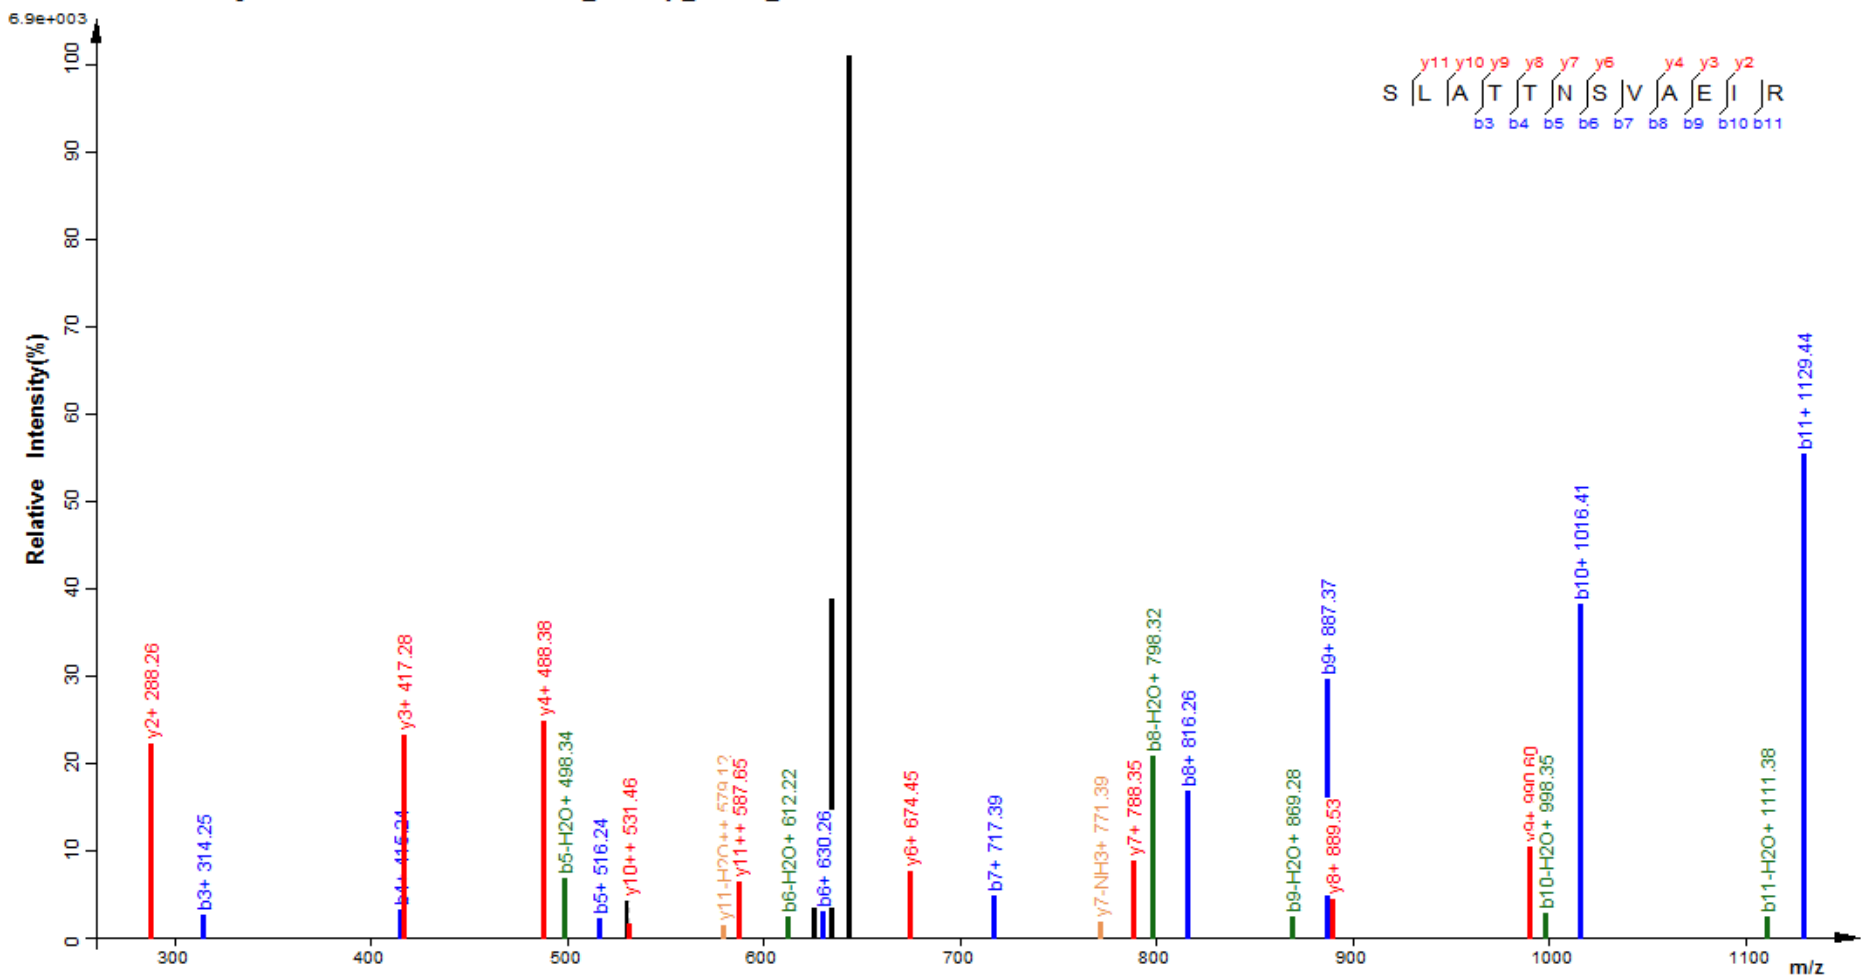



# Protein

gi|27376244|ref|NP\_767773.1|

# Peptide

SVIDLAANPSDLR

10103.mgf\_PSM.mgf-20324 SEQ:SVIDLAANPSDLR 0\_N-Acetyl Protein\_42.010

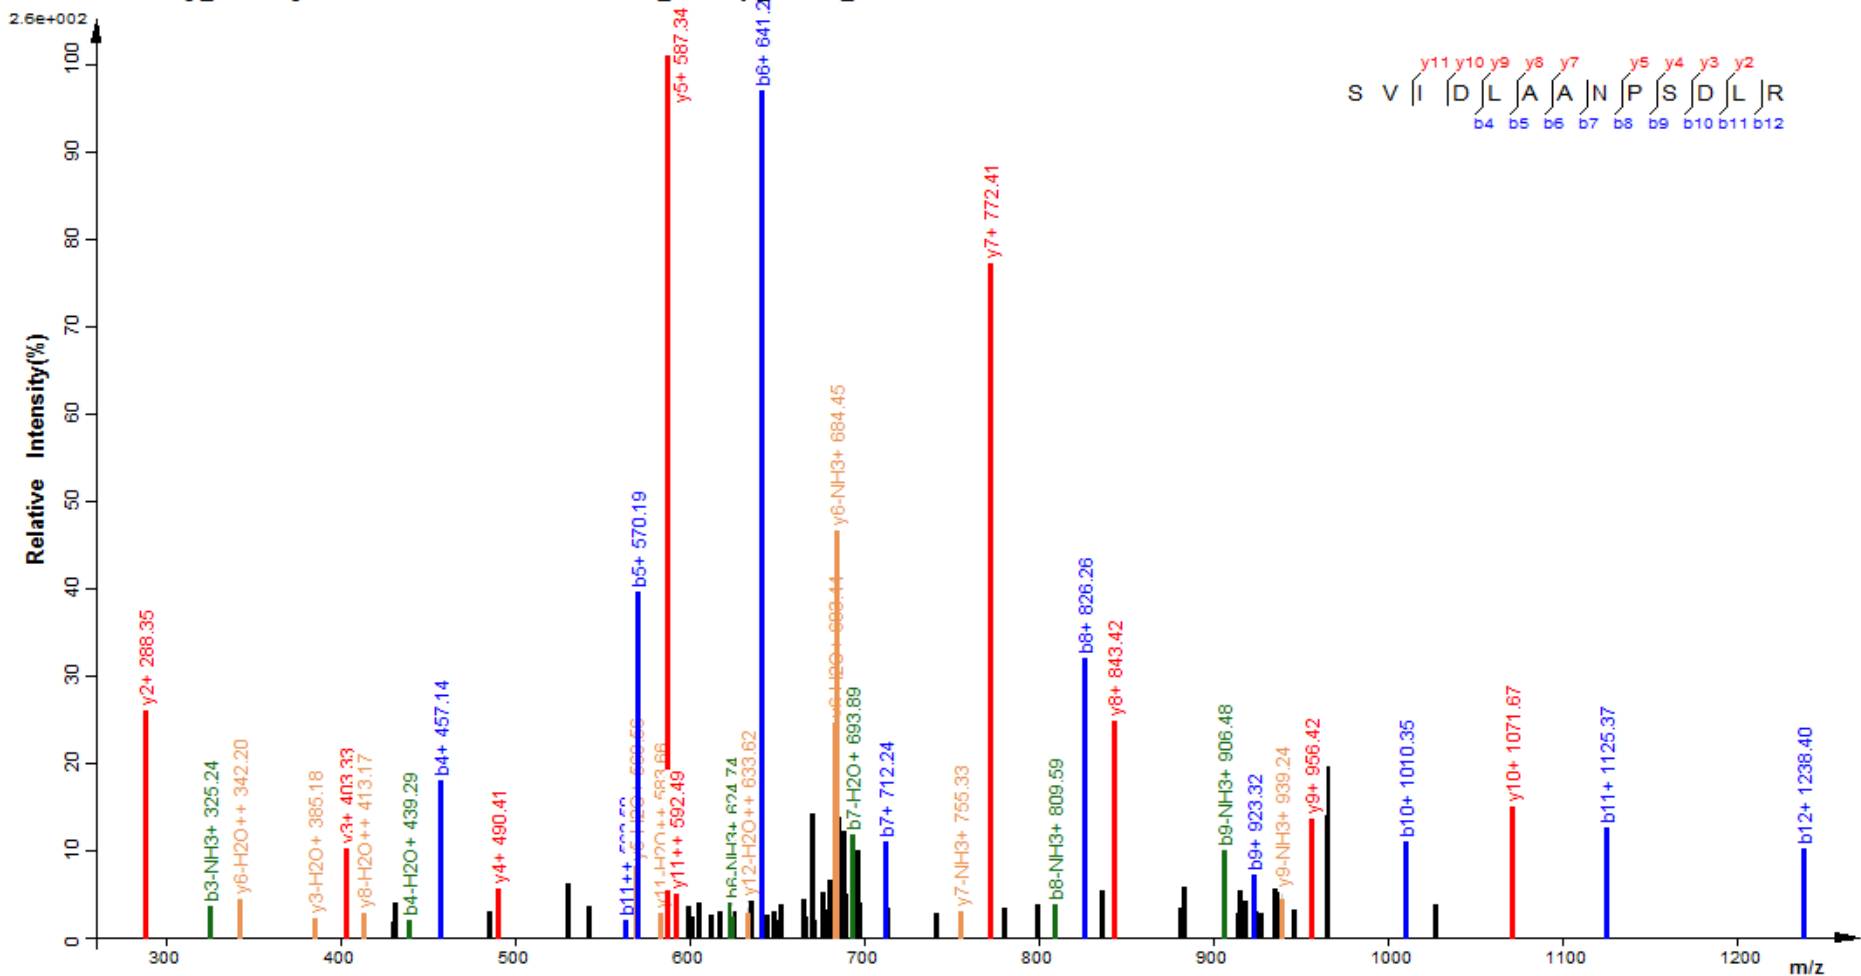

# Protein

gi|27381111|ref|NP\_772640.1|

# Peptide

TAIDATTDRPAPK

10099.mgf\_PSM.mgf-33686 SEQ:TAIDATTDRPAPK 0, N-Acetyl\_Protein\_42.010

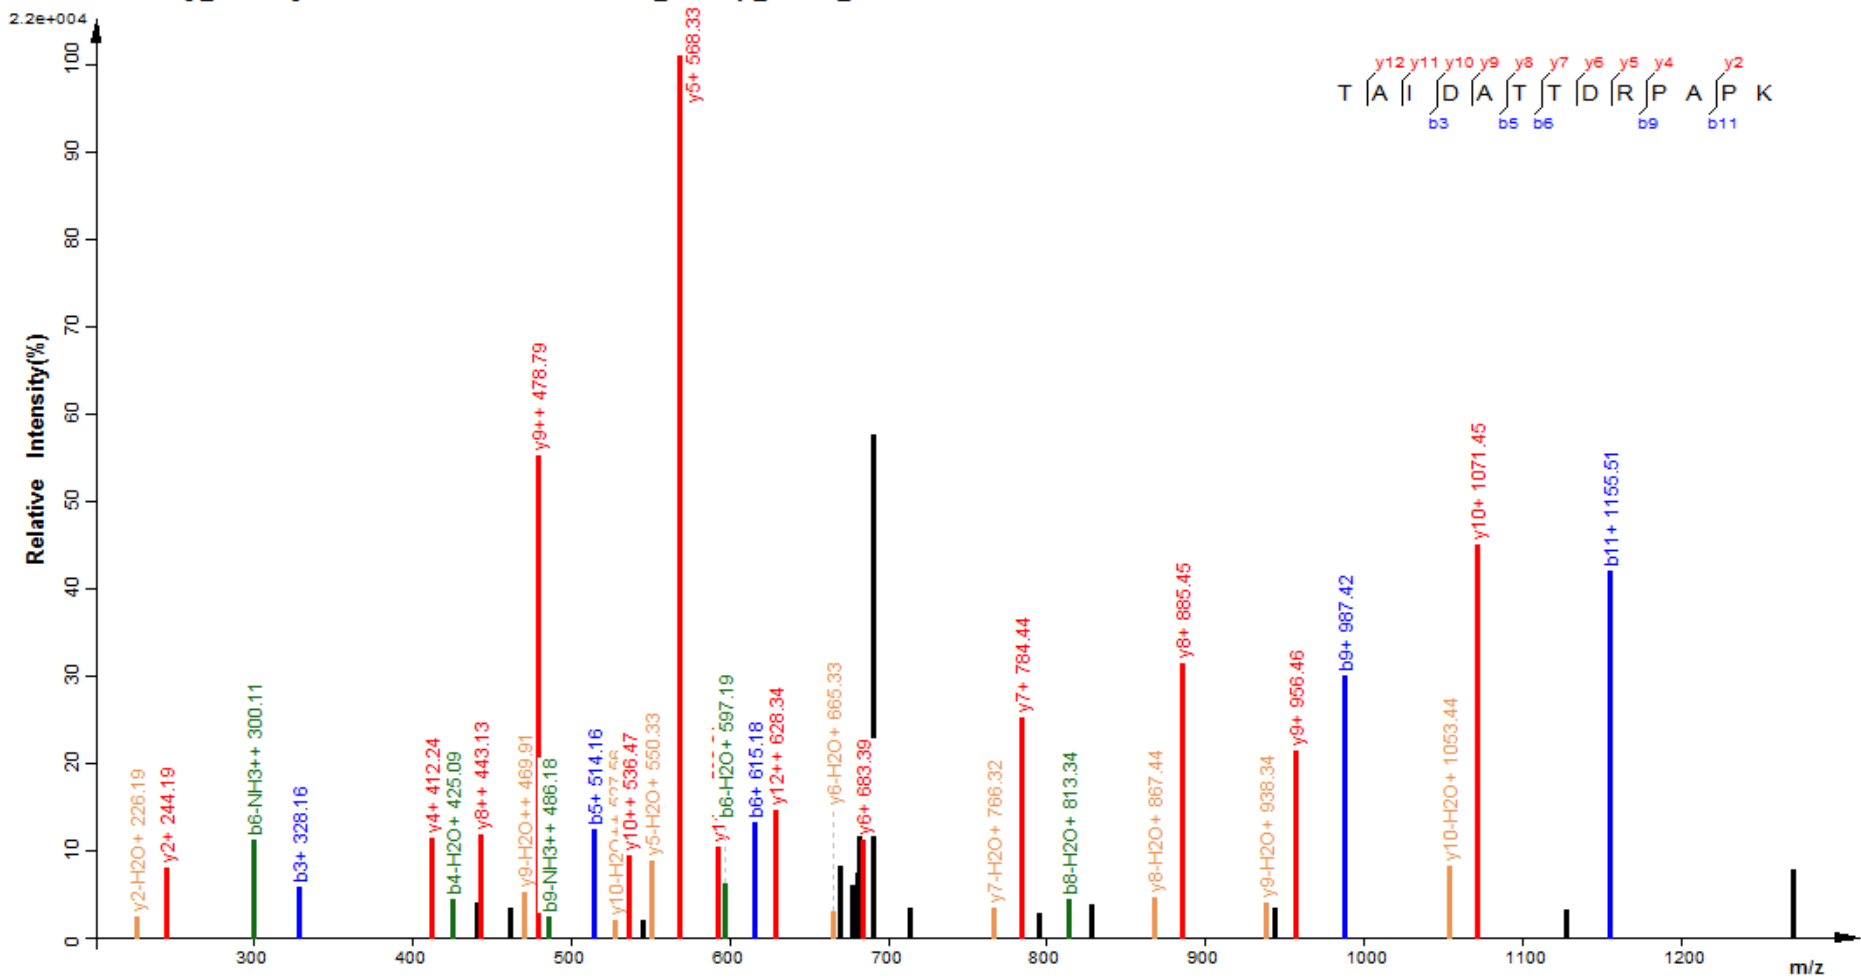

# Protein

gi|27377877|ref|NP\_769406.1|

# Peptide

TDHSEFDSVSGK

10099.mgf\_PSM.mgf-687 SEQ:TDHSEFDSVSGK 0\_N-Acetyl\_Protein\_42.010

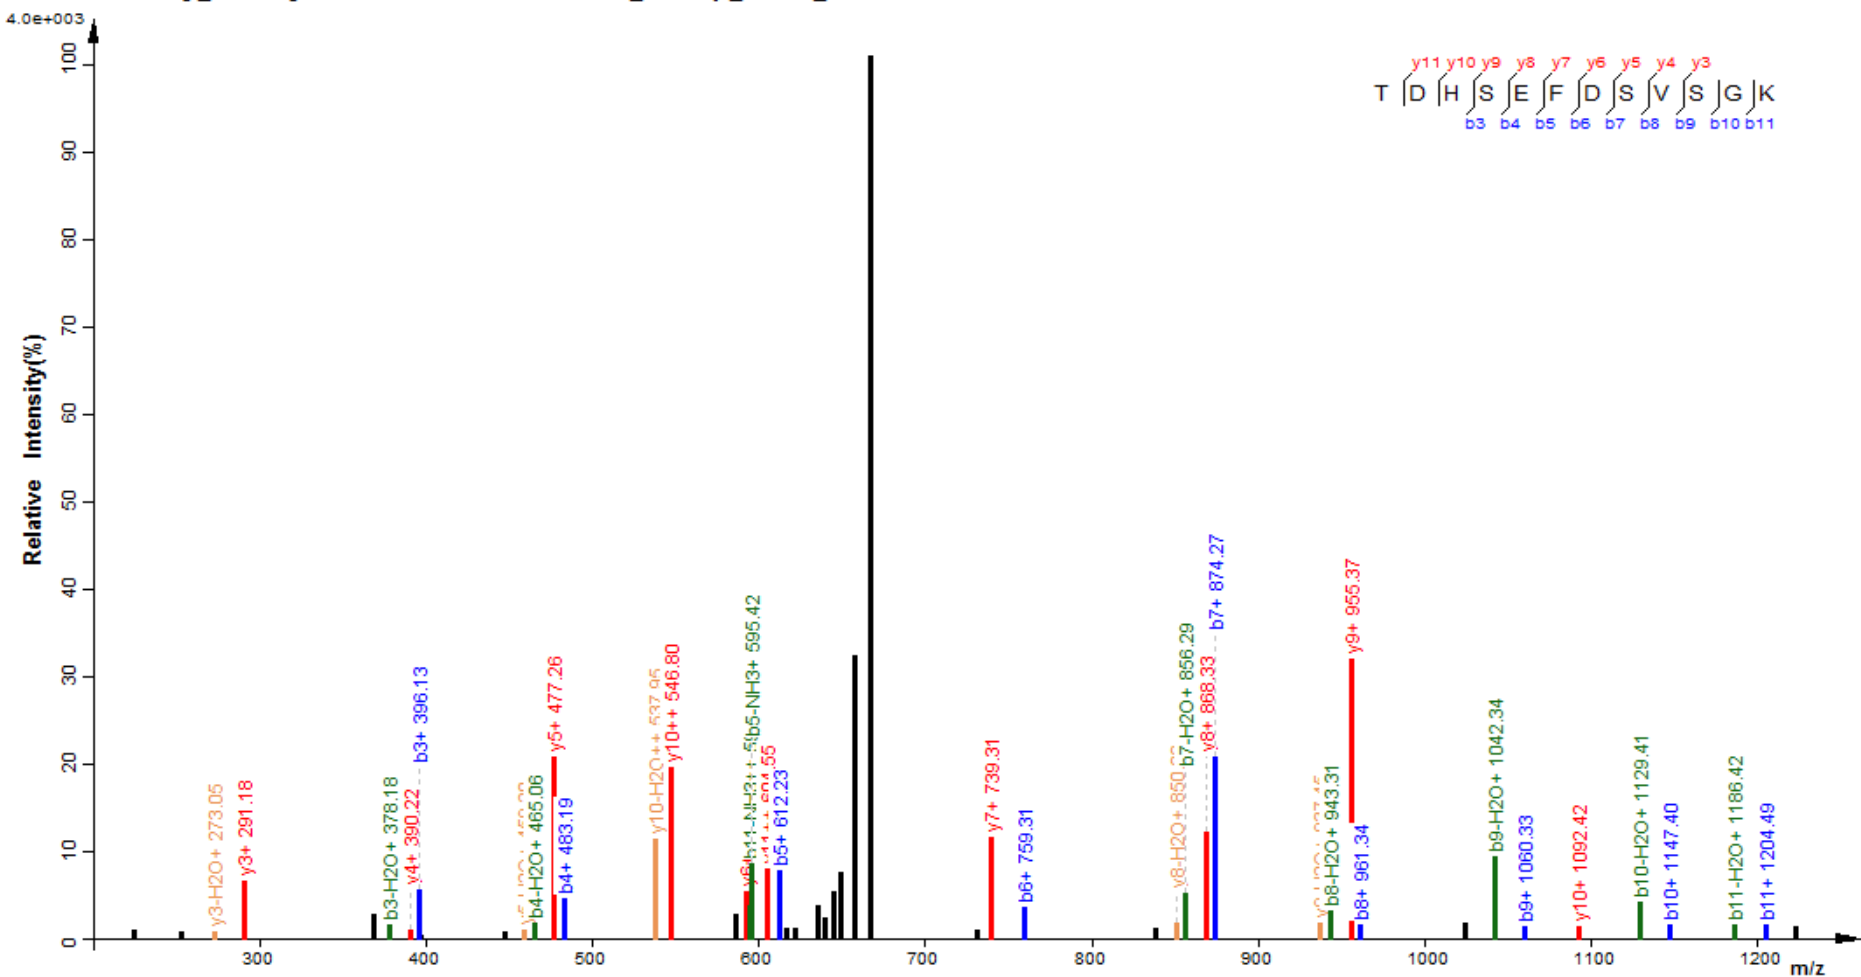

# Protein

gi|27377518|ref|NP\_769047.1|

# Peptide

TGHDHTSHHAHDHDDR

10115.mgf\_PSM.mgf-47113 SEQ: TGHDHTSHHAHDHDDR 0\_N-Acetyl\_Protein\_42.010

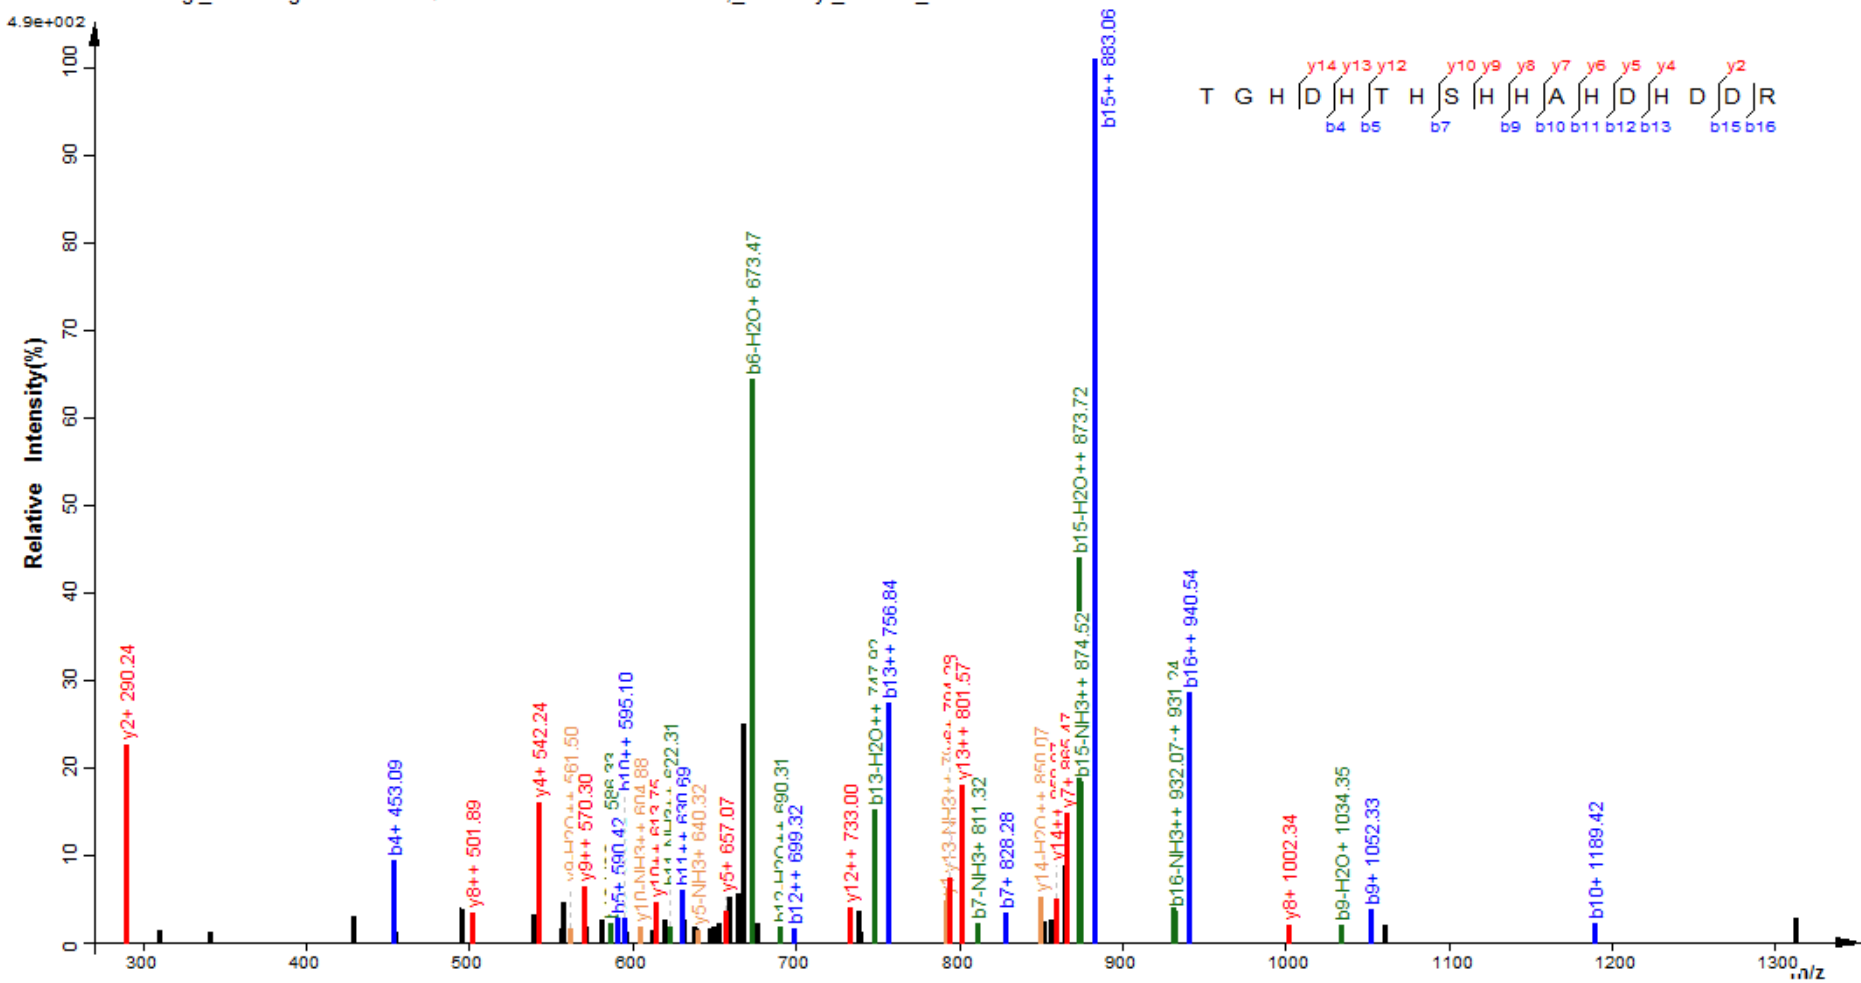

# Protein

gi|27375705|ref|NP\_767234.1|

# Peptide

TIIDQGNGAAGPAAADLIK

10099.mgf\_PSM.mgf-35220 SEQ:TIIDQGNGAAGPAAADLIK 0\_N-Acetyl\_Protein\_42.010

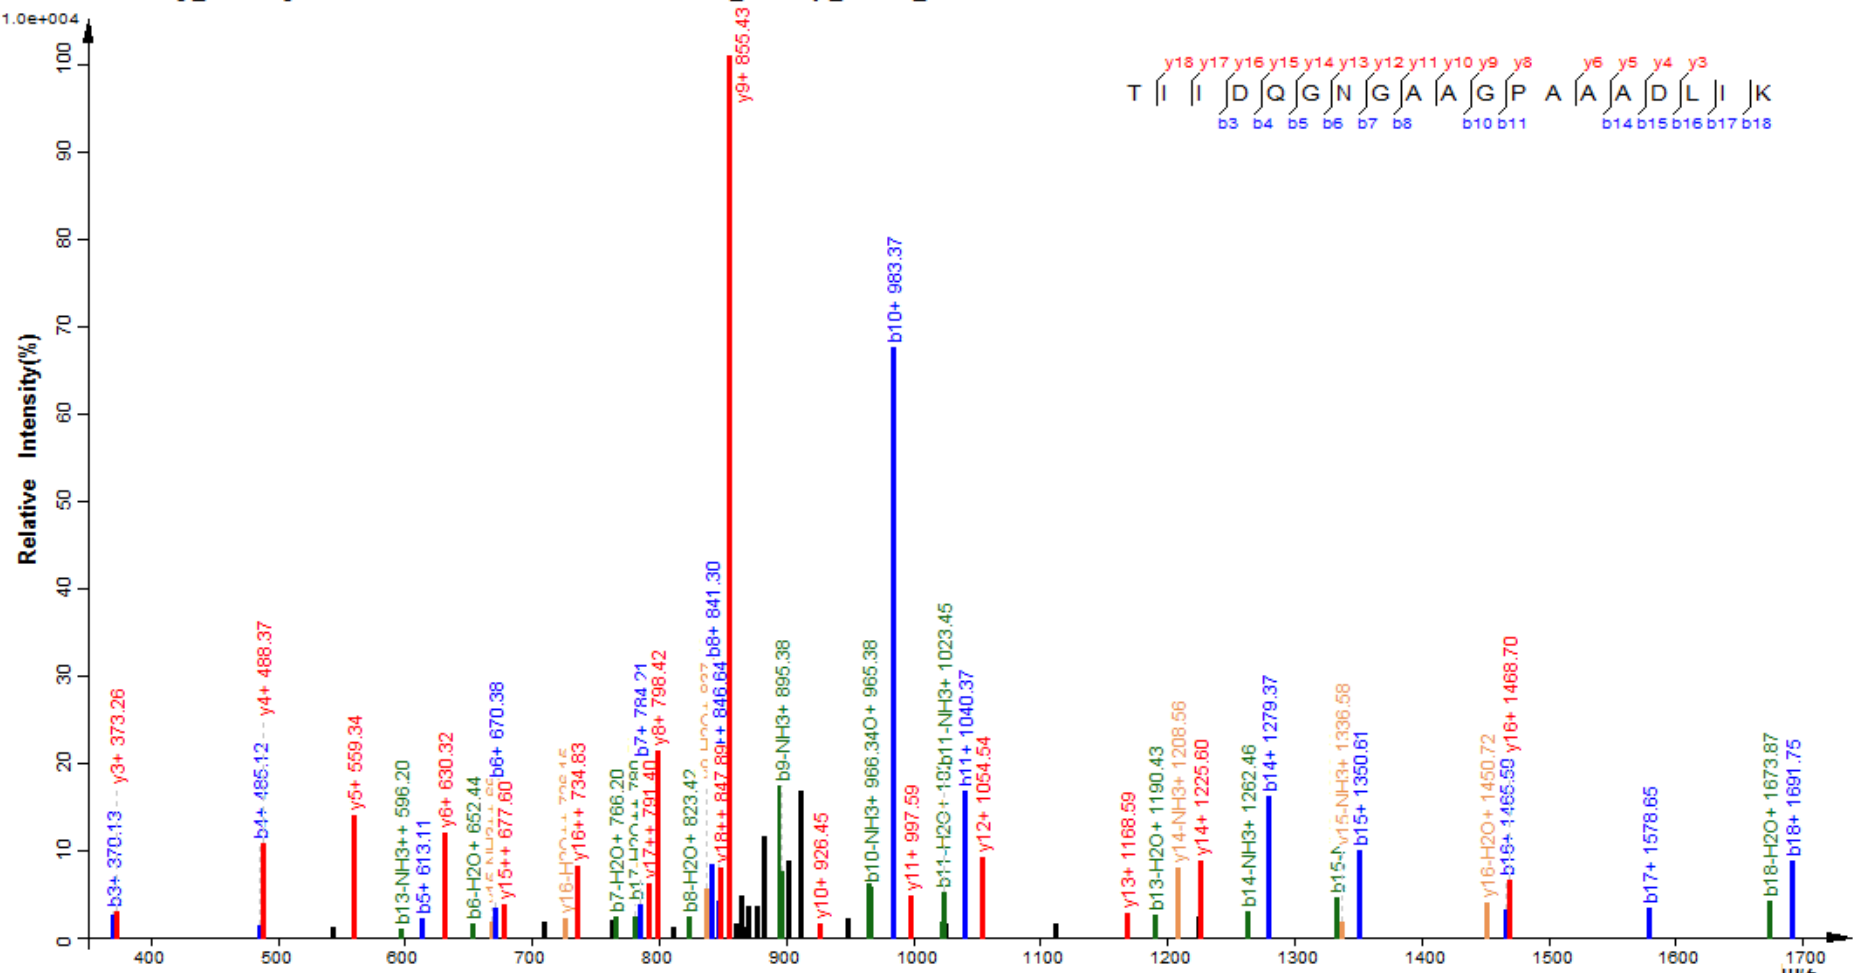

# Protein

gi|27378113|ref|NP\_769642.1|

# Peptide

TLEATSPGASYGSTASGSSFYAAMR

10116PSM.mgf-86148 SEQ:TLEATSPGASYGSTASGSSFYAAMR 0\_N-Acetyl\_Protein\_42.010 23\_Oxidation\_M\_15.995

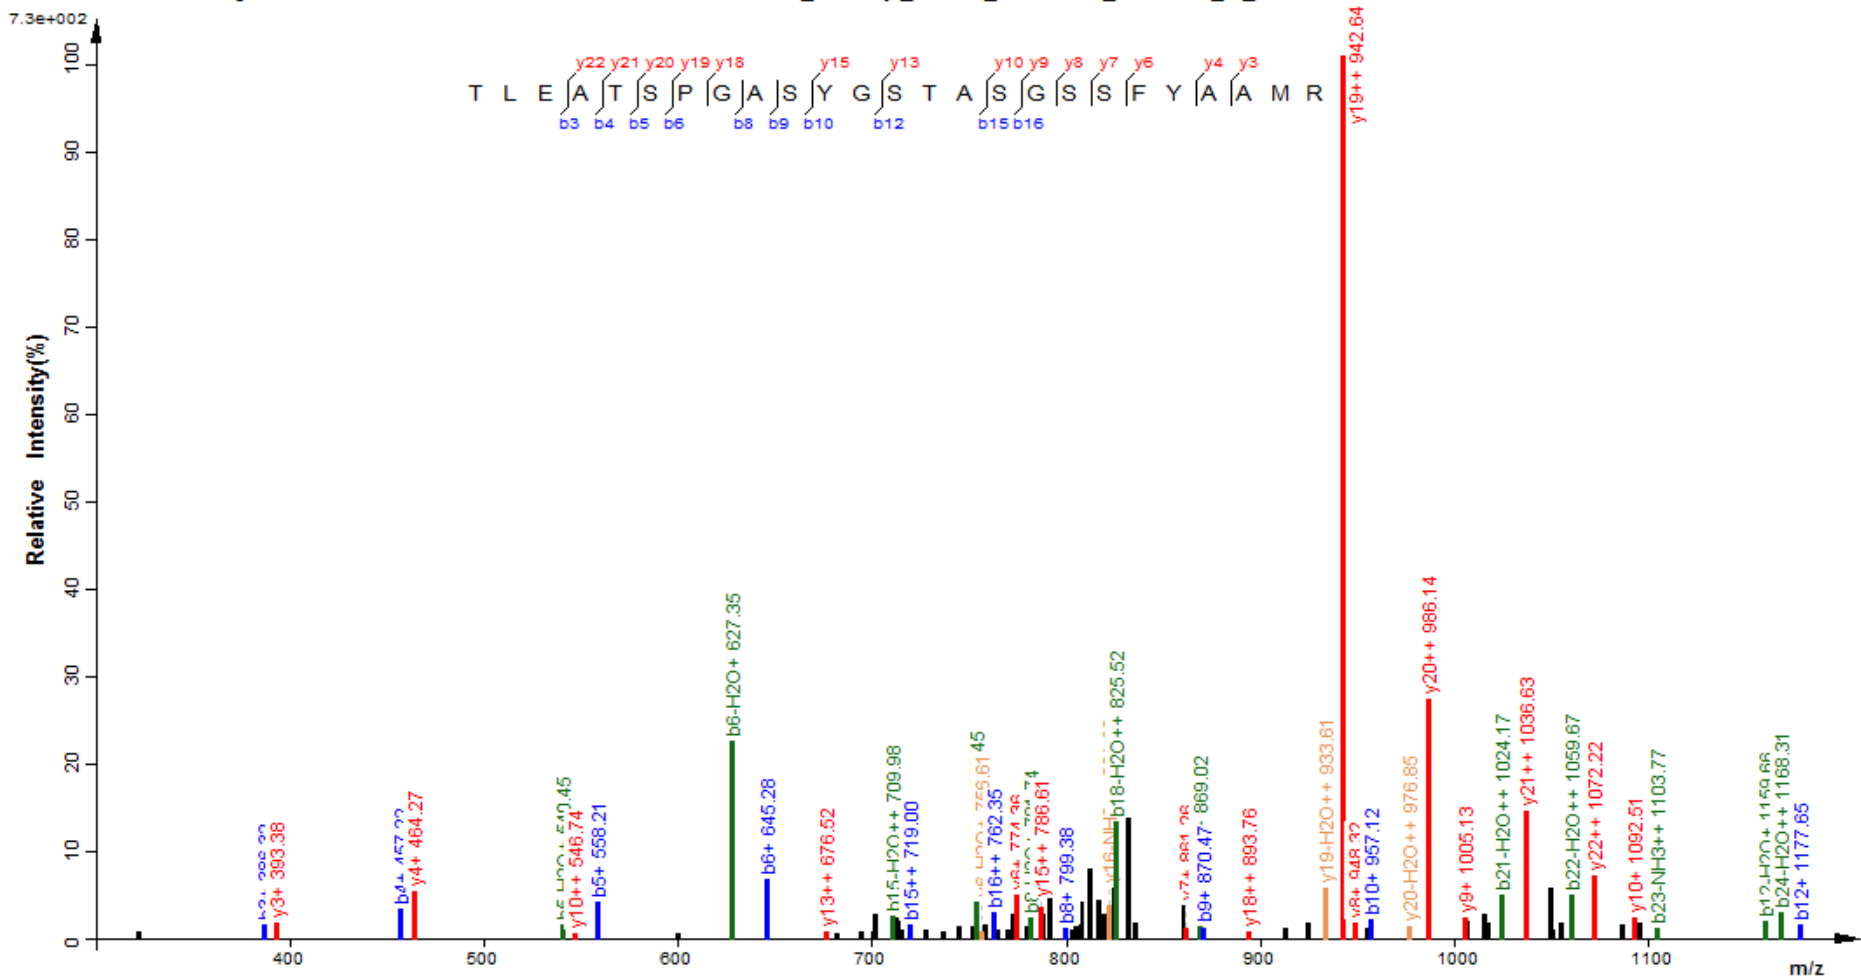

# Protein

gi|27377998|ref|NP\_769527.1|

# Peptide

TTETNTAFEGFKDAFK

10104.mgf\_PSM.mgf-59960 SEQ:TTETNTAFEGFKDAFK 0,\_N-Acetyl\_Protein\_42.010

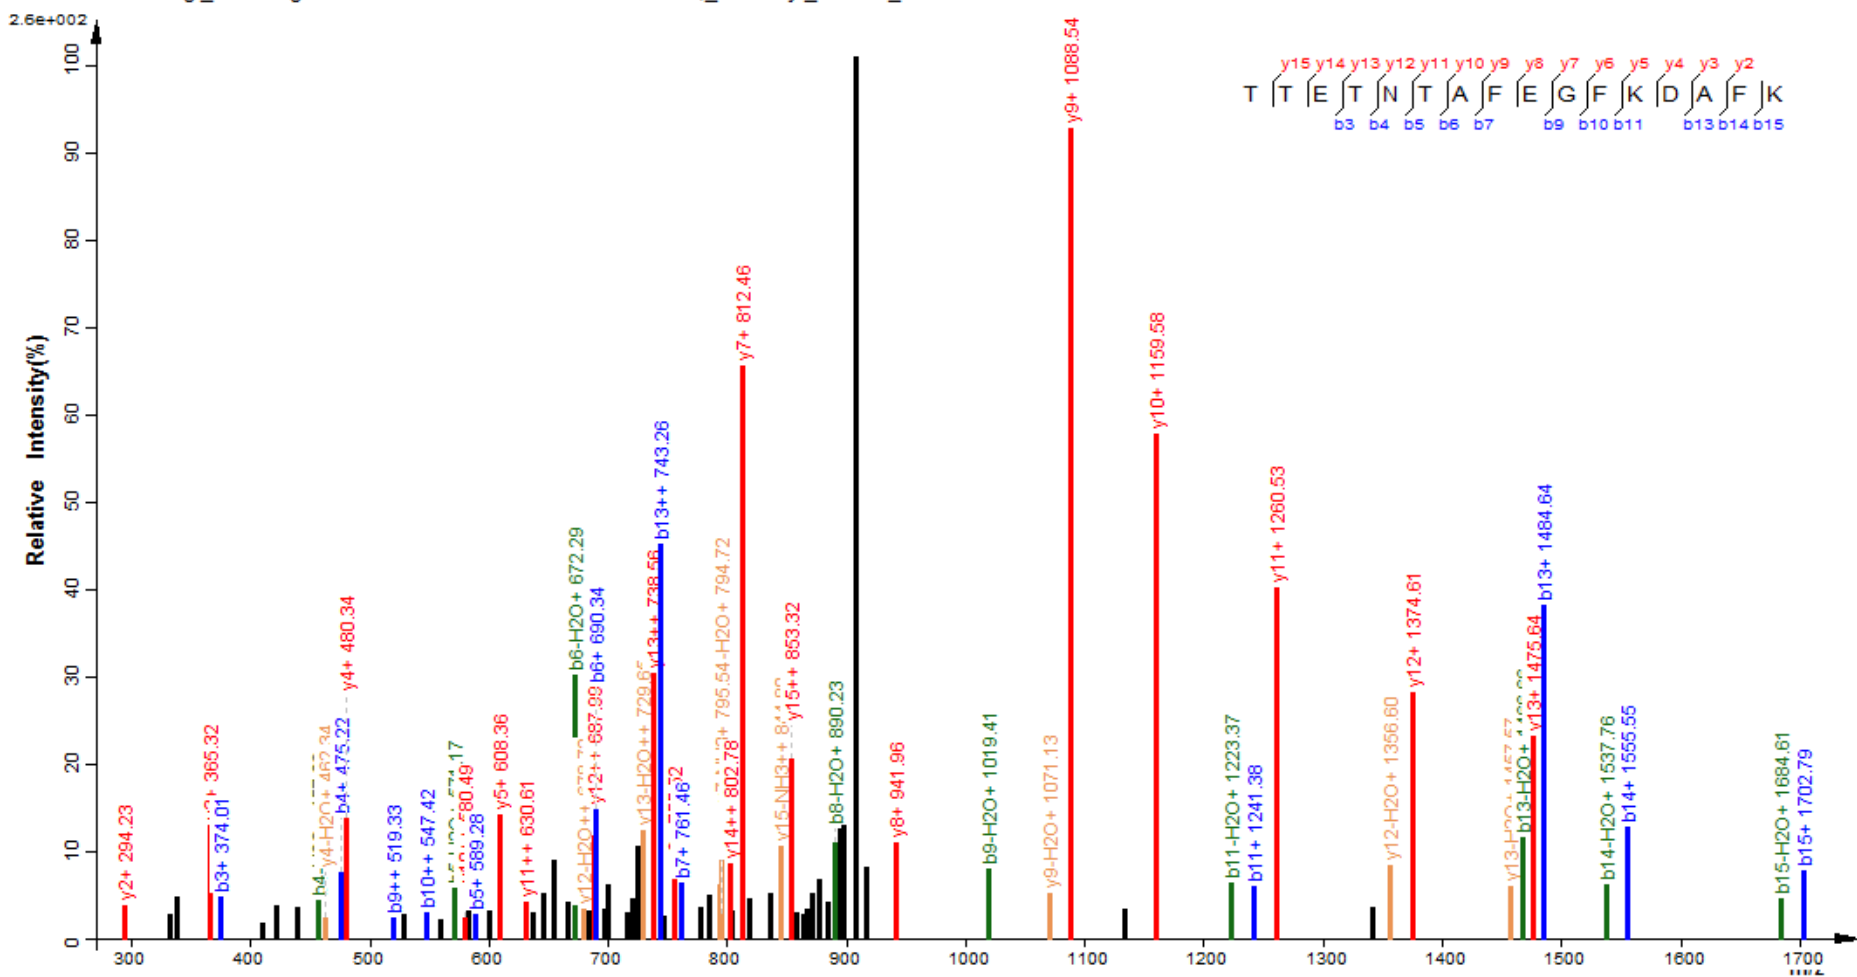

Supplement: supp_M112.027169_mcp.M112.027169-7.pdf [file supp_M112.027169_mcp.M112.027169-7.pdf]
