# Supplementary material
Source: PubMed Central journal article supplement (PMC3820949)

**Annotated peptide spectral matches of single peptide hits**

Translation ID

Peptide

Total PSM

chrGI:27375111:ref:NC004463.1:\_4603653\_4603312\_-1

VIAGEQGAQR

23

E:\PROJECTS\Bradyrhizobium\_japonicum\INPUT\10115.mgf-63507 SEQ:VIAGEQGAQR Charge:2 MH+:1028.5483

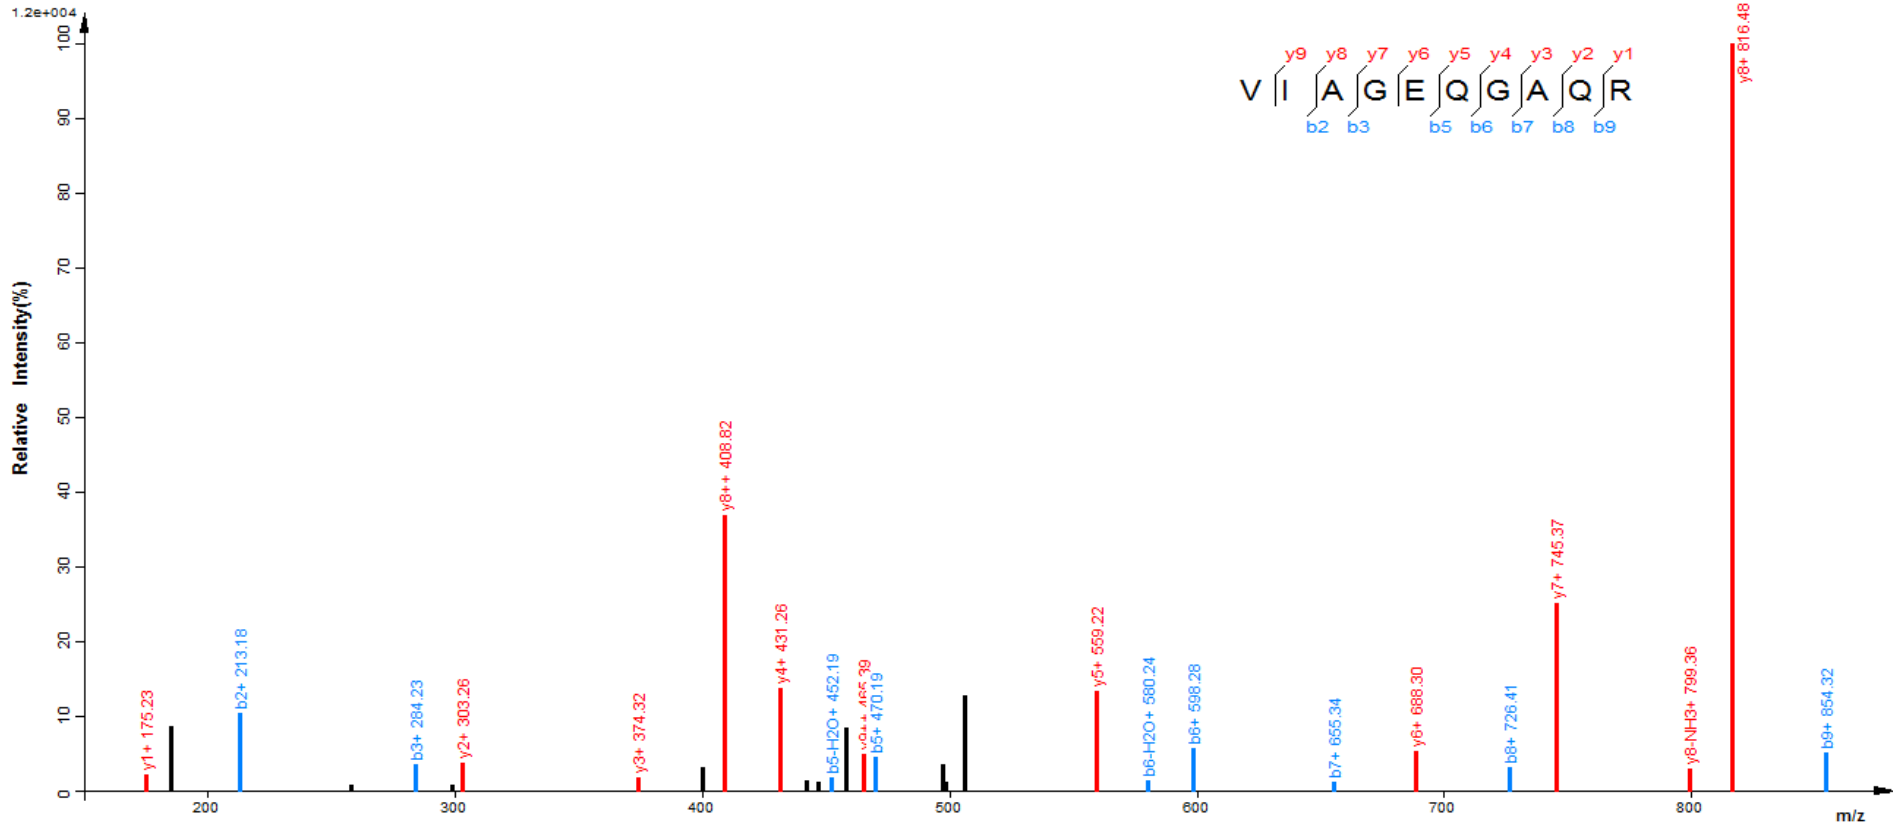

Translation ID

Peptide

Total PSM

chrGI:27375111:ref:NC004463.1:\_6676608\_6676399\_-1

AGSTIPSAEAPDR

27

E:\PROJECTS\Bradyrhizobium\_japonicum\INPUT\10116.mgf-54525 SEQ:AGSTIPSAEAPDR Charge:2 MH+:1368.6771

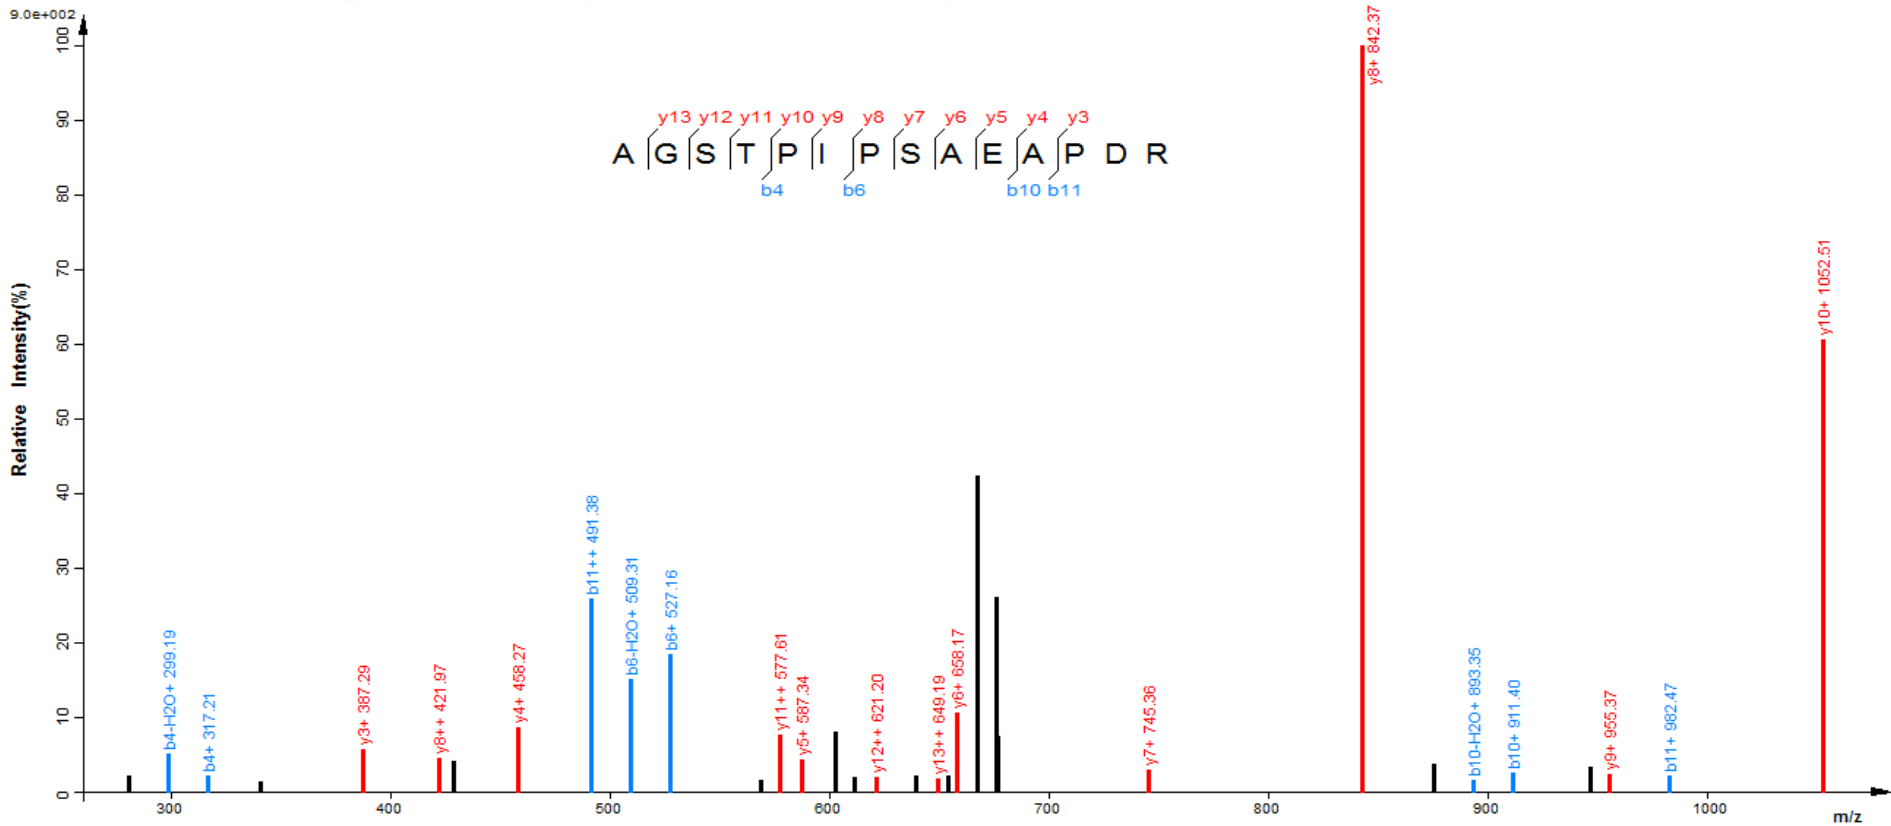

Translation ID

Peptide

Total PSM

chrGI:27375111:ref:NC004463.1:\_1698235\_1698438\_1

VTPLSQELPAHSR

18

E:\PROJECTS\Bradyrhizobium\_japonicum\INPUT\10100.mgf-48079 SEQ:VTPLSQELPAHSR Charge:3 MH+:1434.7667

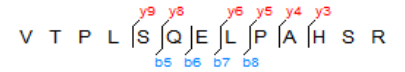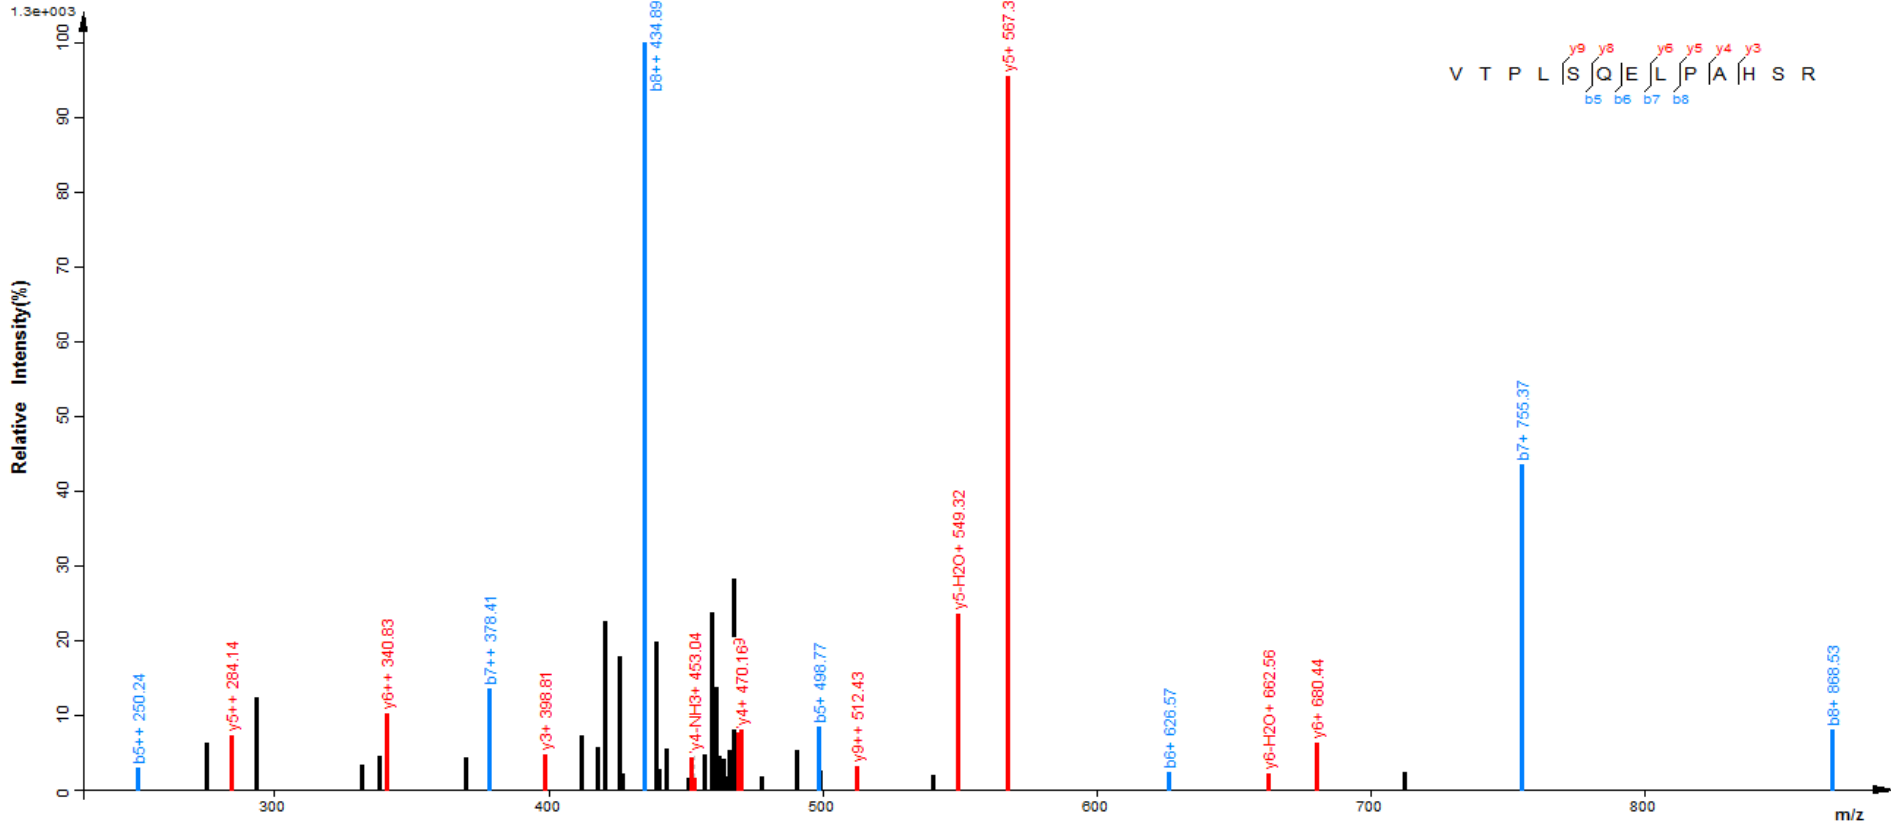

Translation ID

Peptide

Total PSM

chrqi:27375111:ref:NC004463.1:\_896768\_896406\_-2

ALANAEPALMR

26

E:\PROJECTS\Bradyrhizobium\_japonicum\INPUT\10116.mgf-47380 SEQ:ALANAEPALMR 10\_Oxidation\_M\_15.995 Charge:2 MH+:1172.6089

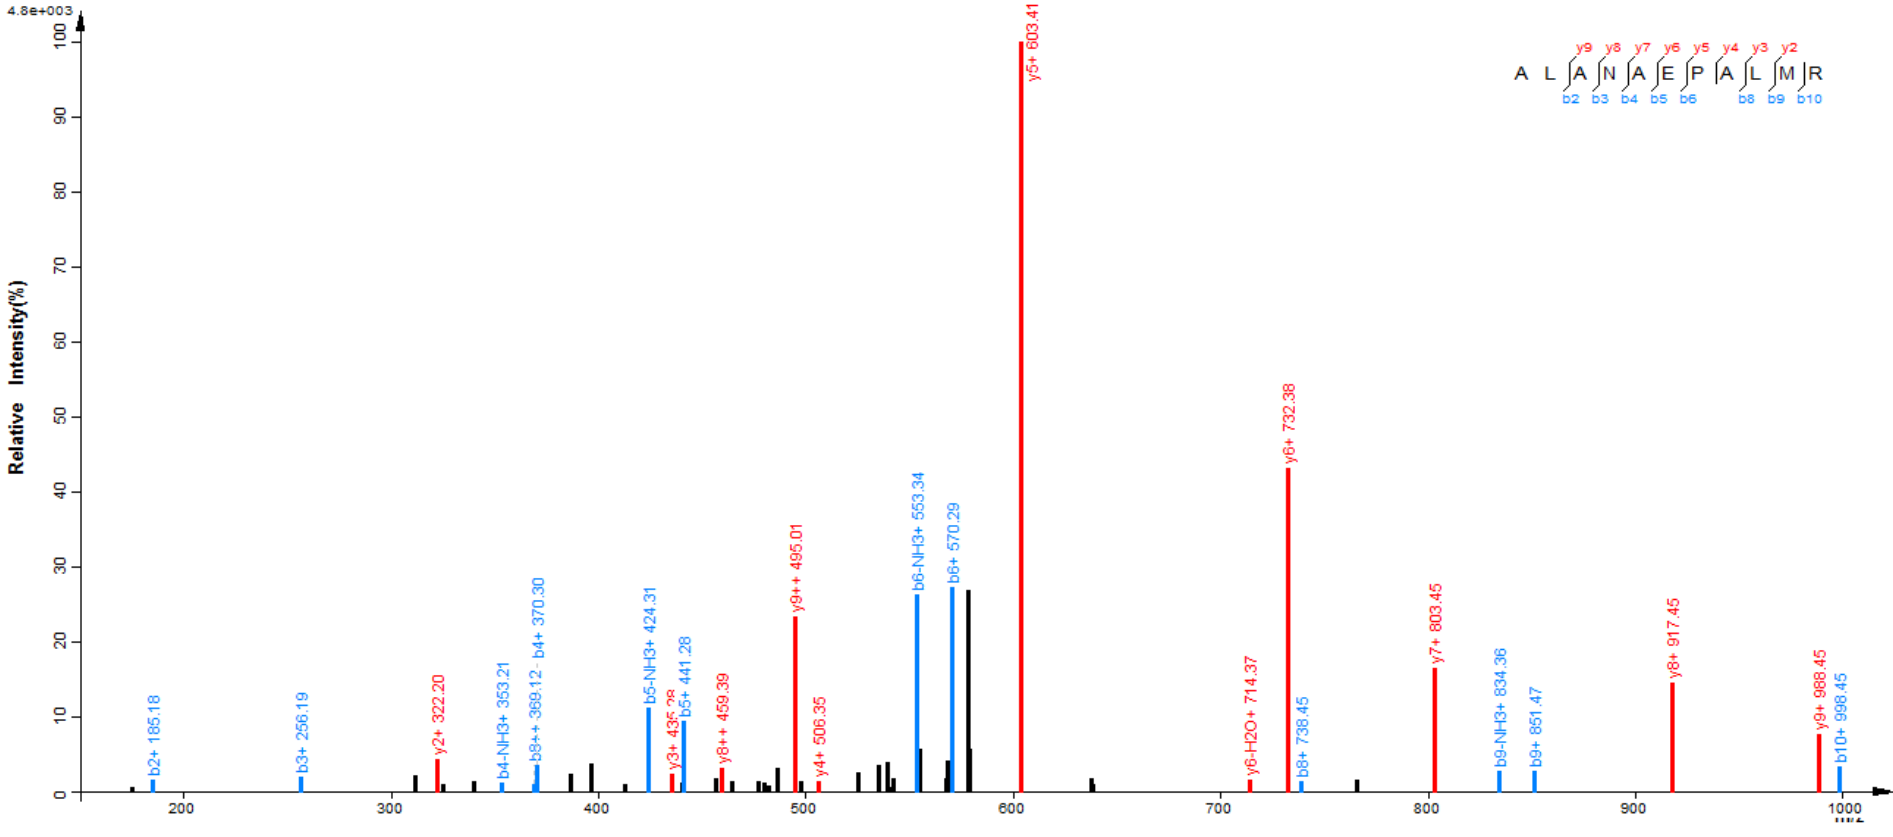

| Translation ID                                  | Peptide  | Total PSM |
|-------------------------------------------------|----------|-----------|
| chrGI:27375111:ref:NC004463.1:_302817_302362_-1 | FEFEIEIR | 13        |

E:\PROJECTS\Bradyrhizobium\_japonicum\INPUT\10116.mgf-58614 SEQ:FEFEIEIR Charge:2 MH+:1082.4907

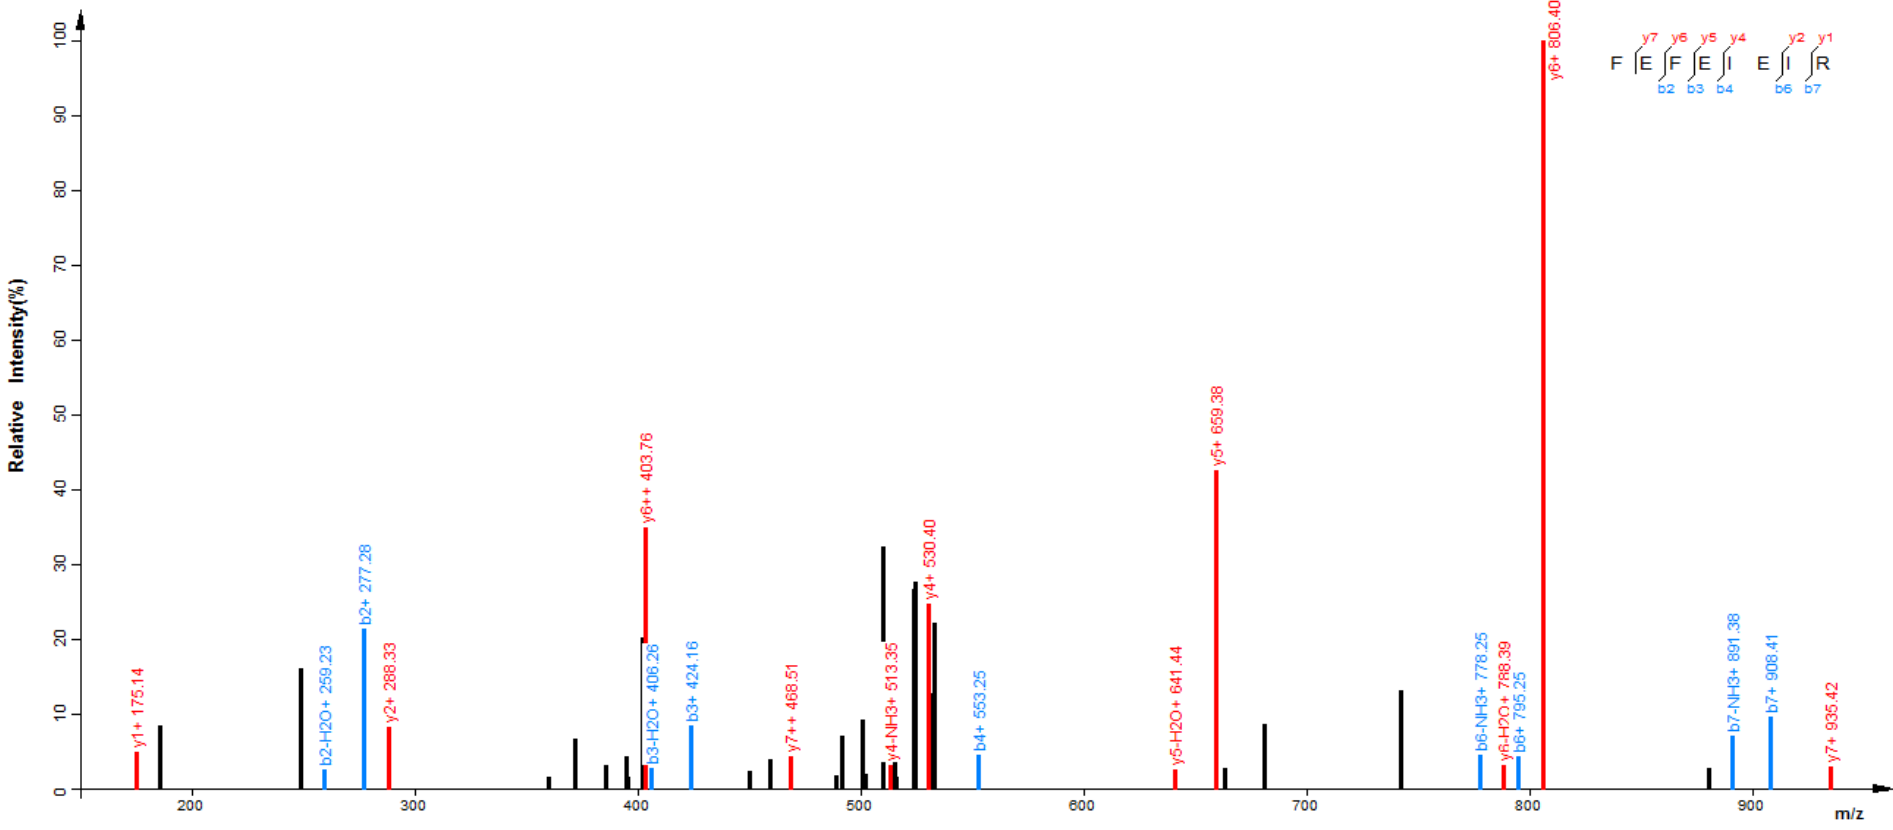

Translation ID

Peptide

Total PSM

chrqi:27375111:ref:NC004463.1:\_7834140\_7833187\_-1

WLSEPTGVVAGAK

14

E:\PROJECTS\Bradyrhizobium\_japonicum\INPUT\10114.mgf-1367 SEQ:WLSEPTGVVAGAK Charge:2 MH+:1443.7494

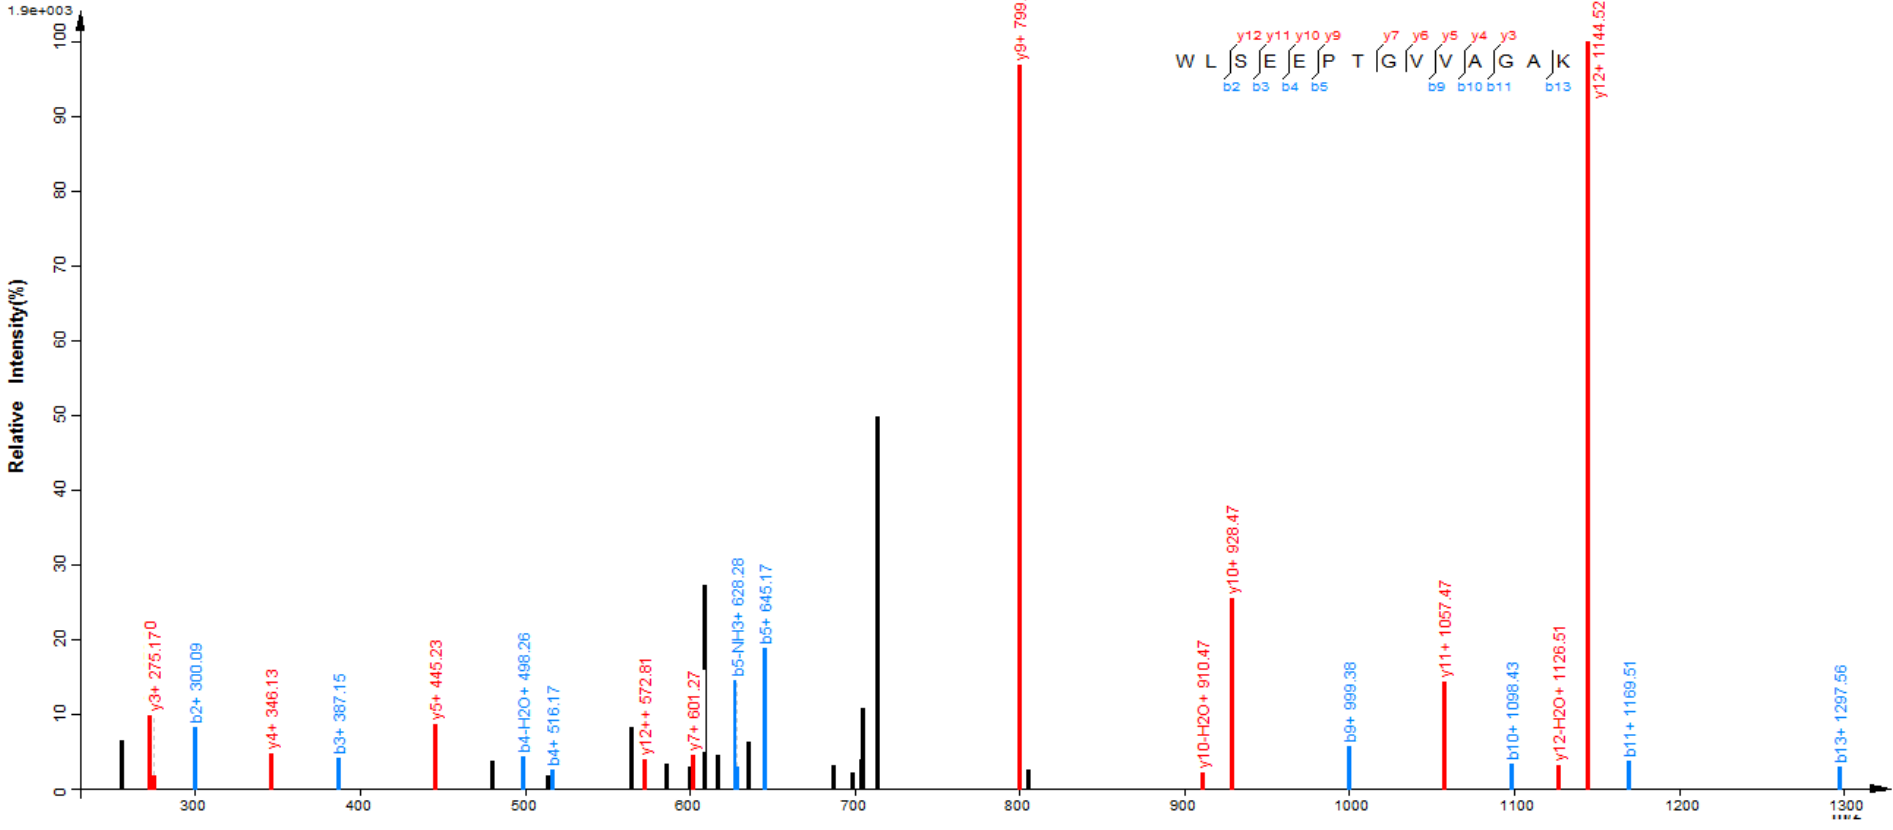

Supplement: supp_M112.027169_mcp.M112.027169-3.pdf [file supp_M112.027169_mcp.M112.027169-3.pdf]
