# Supplementary material
Source: PubMed Central journal article supplement (PMC3820949)
Supplement: supp_M112.027169_mcp.M112.027169-8.pdf [file supp_M112.027169_mcp.M112.027169-8.pdf]

### Proteogenomic re-annotation of *Shigella flexneri* 2a 2457T by GenoSuite

Data with PRIDE accessions 18992-18999 were downloaded from PRIDE database. In total 1,531,533 tandem mass spectra were searched against a 6 frame translated database of *S. flexneri* 2a 2457T genome (NC\_004741.1). Search was performed in GenoSuite with OMSSA and Xltandem algorithms with following search parameters. Trypsin as protease, 1 missed cleavage, carbamidomethylation of cysteine as fixed modification, methionine oxidation as variable modification, 1 Da precursor ion tolerance and 0.8 da product ion tolerance. By applying GenoSuite, We discovered 28 novel protein coding regions and 22 gene model changes demonstrating rapid and automated proteogenomic analyses of prokaryotic genomes.

**Table 1: Novel protein coding regions identified by GenoSuite**

| Database ID                                       | Locus ID      | #Unique Peptide count | Significant PSMs (Unique Peptides) | Peptides                                                                                                                                             |
|---------------------------------------------------|---------------|-----------------------|------------------------------------|------------------------------------------------------------------------------------------------------------------------------------------------------|
| chrgi:30061571:ref:NC004741.1:_1043868_1044107_3  | NOVEL Protein | 4                     | 105                                | QAETEIADFIAQK<br>MTGLESYDVK<br>NTGKEVSEIR<br>IAELNKNTGK                                                                                              |
| chrgi:30061571:ref:NC004741.1:_1320035_1320313_2  | NOVEL Protein | 2                     | 2                                  | SASNRPMNAPSWPHLR<br>GSNWVVNSGCPQALK                                                                                                                  |
| chrgi:30061571:ref:NC004741.1:_1351722_1351561_-1 | NOVEL Protein | 2                     | 12                                 | LMNNEEISEEAQHEMAAEAGINPVR<br>IDEIAEFLNQWGNE                                                                                                          |
| chrgi:30061571:ref:NC004741.1:_1389606_1388686_-1 | NOVEL Protein | 7                     | 16                                 | AIGTVSAVNIGSMFR<br>TEDVSAVIDYLTTLTSYVDNTR<br>AQYPTAPGYATLR<br>TSDISSEYAIMPLAPMK<br>SIDALPHIEAGSNAR<br>QYPAIVVSHPGGGVK<br>TSDISSEYAIMPLAPMKEADAPNEELR |
| chrgi:30061571:ref:NC004741.1:_148655_148843_2    | NOVEL Protein | 1                     | 6                                  | SVFITSLPNSMISR                                                                                                                                       |

|                                                       |               |    |     |                                                                                                                                                                            |
|-------------------------------------------------------|---------------|----|-----|----------------------------------------------------------------------------------------------------------------------------------------------------------------------------|
| chrgi:30061571:ref:NC004741.1:<br>_1960728_1960447_-1 | NOVEL Protein | 2  | 23  | NIDFTHHPAAADPVTMR<br>QILDVLDVIAPVEVR                                                                                                                                       |
| chrgi:30061571:ref:NC004741.1:<br>_1972745_1972386_-2 | NOVEL Protein | 10 | 90  | DGTLQALSEK<br>IDAILVDR<br>TNDTLAVTGEAFSR<br>AVNDIAIEMQK<br>LAALDLVK<br>WFGADVTK<br>KTNDTLAVTGEAFSR<br>LAALDLVKK<br>VGRIDAILVDR<br>TYDDDPTKYQDLR                            |
| chrgi:30061571:ref:NC004741.1:<br>_1973274_1972657_-1 | NOVEL Protein | 9  | 321 | KVGVGLGTNYEEWLR<br>HLGVEASLKPTK<br>VGVGLGTNYEEWLR<br>RIDVVINQVTISDER<br>WDGMLASLDSK<br>KYDFSTPYTISGIQALVK<br>ESGTLVGLGTYPPFSFQGGDDGK<br>YDFSTPYTISGIQALVK<br>LTGFVEFAQQLAK |
| chrgi:30061571:ref:NC004741.1:<br>_2027758_2027252_-3 | NOVEL Protein | 3  | 68  | ISCPSPSASGAILR<br>TSADNDVDLDTDGFR<br>AGVNVNGESGVTYENCK                                                                                                                     |
| chrgi:30061571:ref:NC004741.1:<br>_204580_204356_-3   | NOVEL Protein | 2  | 68  | VLNEMAADDALSEAVR<br>YAEIASGDLGYVPDALGCVLK                                                                                                                                  |
| chrgi:30061571:ref:NC004741.1:<br>_2173966_2174352_1  | NOVEL Protein | 3  | 14  | NLPAPDAGTHWTYMGGAYVLISDTDGK<br>YELSSFIADFK<br>HFKPGDTPPEMYR                                                                                                                |
| chrgi:30061571:ref:NC004741.1:<br>_2188194_2190122_3  | NOVEL Protein | 2  | 3   | RATVGLDILAAIGSDIALMQLNGIAQK<br>FPQEEALYPGLLQVK                                                                                                                             |
| chrgi:30061571:ref:NC004741.1:<br>_2411849_2412037_2  | NOVEL Protein | 1  | 12  | VLFPDPDDPMMLITSPAFACSETPFSTSCSP                                                                                                                                            |
| chrgi:30061571:ref:NC004741.1:                        | NOVEL Protein | 2  | 2   | DGSPEAALSEFIK                                                                                                                                                              |

|                                                      |               |    |     |                                                                                                                                                                                          |
|------------------------------------------------------|---------------|----|-----|------------------------------------------------------------------------------------------------------------------------------------------------------------------------------------------|
| _2527364_2528194_2                                   |               |    |     | SFEAMGVSLVVHPHNPYVPTSHANVR                                                                                                                                                               |
| chr3:30061571:ref:NC004741.1:<br>_2834428_2833628_-3 | NOVEL Protein | 4  | 151 | ALVEEPPSDNDLAEELLSSQGATQR<br>LDHEPSAEEIAEQLDKPVDDVSR<br>VHDLNEDAEDENGVEVFDEK<br>GLALLDLIEEGNLGLIR                                                                                        |
| chr3:30061571:ref:NC004741.1:<br>_2983916_2984230_2  | NOVEL Protein | 1  | 5   | TLNSHSGEVNGSLLVAGSVGNTSIAAPAR                                                                                                                                                            |
| chr3:30061571:ref:NC004741.1:<br>_3259632_3259811_3  | NOVEL Protein | 1  | 101 | SIASPRNSISK                                                                                                                                                                              |
| chr3:30061571:ref:NC004741.1:<br>_3354779_3355015_2  | NOVEL Protein | 1  | 5   | VAIDQAELIAQEVK                                                                                                                                                                           |
| chr3:30061571:ref:NC004741.1:<br>_3358644_3359855_3  | NOVEL Protein | 3  | 7   | TLAQLIDFGEIKR<br>VGDFAVAVGNPFGLGQTATSGIVSALGR<br>SGLNLEGFENFIQTDASINR                                                                                                                    |
| chr3:30061571:ref:NC004741.1:<br>_3743922_3744953_3  | NOVEL Protein | 3  | 87  | VPDSQVLADLDHVASWASR<br>EGDPNDFADIPTLLSGLVAK<br>QSDGPLPVVIVVQEIFGVHEHIR                                                                                                                   |
| chr3:30061571:ref:NC004741.1:<br>_4273690_4274031_1  | NOVEL Protein | 1  | 5   | CSVIAFTITVRSSFPWR                                                                                                                                                                        |
| chr3:30061571:ref:NC004741.1:<br>_4451380_4450616_-3 | NOVEL Protein | 11 | 465 | WELTIPQELAYGER<br>YLEENAK<br>LIDGTVFDSSVAR<br>VINQGEGAIPAR<br>YLEENAKK<br>GEPAEFPVNGVIPGWIEALTLMPVGSK<br>GAGASIPPSTLVFEVELLEIL<br>HPAVPVDVVHR<br>EGVNSTESGLQFR<br>FQAMAAEGVK<br>VRVHYTGK |
| chr3:30061571:ref:NC004741.1:<br>_4471470_4472066_3  | NOVEL Protein | 2  | 2   | DHNRQTAVNPQTFDMR<br>QTAVNPQTFDMRDGFQLCEQPVQLVLFK                                                                                                                                         |
| chr3:30061571:ref:NC004741.1:                        | NOVEL Protein | 7  | 30  | TNLLFFTK                                                                                                                                                                                 |

|                                                    |               |   |    |                                                                                                                            |
|----------------------------------------------------|---------------|---|----|----------------------------------------------------------------------------------------------------------------------------|
| _4529989_4528454_-3                                |               |   |    | EIWFYEHPYPAGVK<br>LPNGVFNPYTGIK<br>QLPHLLATTNMLLHGIEVPVQIR<br>IFDAQEEALELEQDNYQYPIQQR<br>HLFGDIYEQILK<br>AAVVLPDGTFLFGEGVK |
| chr3:30061571:ref:NC004741.1:<br>_512407_512015_-3 | NOVEL Protein | 1 | 10 | MIIGSRIPASSTMR                                                                                                             |
| chr3:30061571:ref:NC004741.1:<br>_745834_744317_-3 | NOVEL Protein | 3 | 23 | ICLAFQEPALNLSLLR<br>LSVGNNQLTALPELPCQLQELSAFDNR<br>LPALPPHLVALDVSLNR                                                       |
| chr3:30061571:ref:NC004741.1:<br>_821019_822005_3  | NOVEL Protein | 4 | 29 | LGLTNTTFQTVHGLDAPGQFSTAR<br>IMTSYVVGQALK<br>TGTTAGAGYNLVSATQGDNR<br>LISVVLGAK                                              |
| chr3:30061571:ref:NC004741.1:<br>_932538_932275_-1 | NOVEL Protein | 1 | 6  | FAAGITKNNTLMIK                                                                                                             |

**Table 2: N-terminal extension of annotated gene models**

| Database ID                                          | Locus ID | #Unique Peptide count (All) | Significant PSMs (Unique Peptides) | Novel Peptides                      |
|------------------------------------------------------|----------|-----------------------------|------------------------------------|-------------------------------------|
| chr3:30061571:ref:NC004741.1:<br>_2978323_2977118_-3 | S3091    | 4                           | 7                                  | TMQSVDAIVGGGMVGLAVACGLQGSGLRVAVLEQR |
| chr3:30061571:ref:NC004741.1:<br>_2617180_2615645_-3 | S2726    | 22                          | 732                                | MQSVTLCIMPR                         |
| chr3:30061571:ref:NC004741.1:<br>_949746_951428_3    | S0971    | 47                          | 13761                              | LNMTESFAQLFEESLKEIETRPGSIVR         |
| chr3:30061571:ref:NC004741.1:<br>_2182046_2180871_-2 | S2302    | 11                          | 123                                | GVGMNEQSQAQSPEARL                   |

|                                                       |       |    |       |                                                                                      |
|-------------------------------------------------------|-------|----|-------|--------------------------------------------------------------------------------------|
| chrgi:30061571:ref:NC004741.1:<br>_2083678_2084376_1  | S2206 | 4  | 51    | HPALVERSAVMNVVILDTGCANLNSVK                                                          |
| chrgi:30061571:ref:NC004741.1:<br>_132026_132487_2    | S0118 | 2  | 2     | AAIITSMARCDFGALPGAEEHTMDYEFLR                                                        |
| chrgi:30061571:ref:NC004741.1:<br>_974914_973712_-3   | S0989 | 26 | 1031  | WNLVMFENITAAPADPILGLADLFR                                                            |
| chrgi:30061571:ref:NC004741.1:<br>_4329880_4332027_1  | S4404 | 49 | 11422 | NIGISAHIDAGK<br>ILFYTG VNHK<br>IGEVHDGAATMDWMEQEQR<br>ILFYTG VNHKIGEVHDGAATMDWMEQEQR |
| chrgi:30061571:ref:NC004741.1:<br>_2850631_2848826_-3 | S2973 | 9  | 51    | RM TTQVPPSALLPLNPEQLAR                                                               |
| chrgi:30061571:ref:NC004741.1:<br>_677698_678033_1    | S0666 | 4  | 39    | ALQDFVIDKIDDLK<br>GQDIIALDVQ GK<br>ALQDFVIDK                                         |
| chrgi:30061571:ref:NC004741.1:<br>_3408165_3409496_3  | S3545 | 7  | 28    | STLLSPVLPSIFILM KK                                                                   |
| chrgi:30061571:ref:NC004741.1:<br>_3139402_3140622_1  | S3258 | 20 | 753   | EQVMNNFNLHTPTR                                                                       |
| chrgi:30061571:ref:NC004741.1:<br>_2767041_2766622_-1 | S2883 | 5  | 92    | VFFIMSVMLQSLNNIR                                                                     |
| chrgi:30061571:ref:NC004741.1:<br>_2746739_2747119_2  | S2854 | 2  | 143   | VVYRPDINQGNYLTANDVSK                                                                 |
| chrgi:30061571:ref:NC004741.1:<br>_3215089_3213641_-3 | S3331 | 2  | 2     | LIFQILSILPESFIGGVVCSR                                                                |
| chrgi:30061571:ref:NC004741.1:<br>_3650780_3649722_-2 | S3753 | 20 | 307   | KIGVLTSGGDAPGMNAAIR<br>IGVLTSGGDAPGMNAAIR                                            |
| chrgi:30061571:ref:NC004741.1:<br>_3594764_3593790_-2 | S3701 | 8  | 12    | SFIAILPIAMNYRGDGGWIMNIR                                                              |
| chrgi:30061571:ref:NC004741.1:<br>_1929435_1928680_-1 | S2005 | 5  | 71    | GGDFCYS DGEFAAILEDVR<br>ELGFPGLVTGVLDVDGNVDMPR                                       |
| chrgi:30061571:ref:NC004741.1:<br>_1383586_1383065_-3 | S1413 | 12 | 2074  | IIMSQT VHFQGNPVTVANSIPQAGSK                                                          |
| chrgi:30061571:ref:NC004741.1:                        | S4337 | 28 | 275   | LLDEGNTVPFIAR                                                                        |

|                                                       |       |    |     |                      |
|-------------------------------------------------------|-------|----|-----|----------------------|
| _4266014_4263684_-2                                   |       |    |     | IIAGEIQARPEQVDAAVR   |
| chrgi:30061571:ref:NC004741.1:<br>_2969644_2971104_1  | S3086 | 5  | 39  | ELTDLEPMIVKK         |
| chrgi:30061571:ref:NC004741.1:<br>_2286634_2285597_-3 | S2402 | 13 | 124 | GEFIMSLDINQIALHQLIKR |
