# Supplementary material
Source: PubMed Central journal article supplement (PMC3820949)
Supplement: supp_M112.027169_mcp.M112.027169-11.pdf [file supp_M112.027169_mcp.M112.027169-11.pdf]

**Supplementary Table 1: Novel protein coding regions in *B. japonicum* USDA110 genome.**

| NTR_ID   | #Unique Peptide count | Significant PSMs (Unique Peptides) | Peptides                                                                                                                                                                                                                                                                 | Identifying Sample | ORF start | ORF End | Translation Frame | Database ID                                       |
|----------|-----------------------|------------------------------------|--------------------------------------------------------------------------------------------------------------------------------------------------------------------------------------------------------------------------------------------------------------------------|--------------------|-----------|---------|-------------------|---------------------------------------------------|
| BJ_NTR_1 | 14                    | 248                                | RSWLDGGTEVNPGRK<br>PVYGPSGPNTVYQQGR<br>FSDYAFPPAVGYPSFAR<br>SWLDGGTEVNPGRK<br>KFSYAFPPAVGYPSFAR<br>QPLSPSDVGGYPQNFPLY<br>SWLDGGTEVNPGRK<br>RSWLDGGTEVNPGRK<br>GRPVYGPSGPNTVYQQGR<br>GRPVYGPSGPNTVYQQ<br>RPVYGPSGPNTVYQQGR<br>GPNTVYQQGR<br>GRPVYGPSGPNTVY<br>GRPVYGPSGPN | 9                  | 539055    | 539441  | 3                 | chrgi:27375111:ref:NC004463.1:_539010_539441_3    |
| BJ_NTR_2 | 2                     | 2                                  | SRGEVALSDLAADQK<br>KVAPAHPGQADAFSYR                                                                                                                                                                                                                                      | 1                  | 1144191   | 1144466 | 3                 | chrgi:27375111:ref:NC004463.1:_1143780_1144466_3  |
| BJ_NTR_3 | 2                     | 2                                  | LVPGFVTACTLDGDAR<br>LVYAINNER                                                                                                                                                                                                                                            | 1                  | 1225039   | 1224638 | -3                | chrgi:27375111:ref:NC004463.1:_1225108_1224638_-3 |
| BJ_NTR_4 | 2                     | 4                                  | LPSVSLEGIQGHVVGK<br>TRPTEELVDPHDAR                                                                                                                                                                                                                                       | 2                  | 1919566   | 1919712 | 1                 | chrgi:27375111:ref:NC004463.1:_1919398_1919712_1  |
| BJ_NTR_5 | 3                     | 7                                  | HLNELDRK<br>LIPAIDELNADPER<br>HLNELDR                                                                                                                                                                                                                                    | 3                  | 1924411   | 1924770 | 1                 | chrgi:27375111:ref:NC004463.1:_1924396_1924770_1  |
| BJ_NTR_6 | 4                     | 33                                 | ANINLSSQSIAGAR<br>GLALSDLDR<br>LHFGFTGDVMLGLAAVR<br>CCAIWWLYR                                                                                                                                                                                                            | 6                  | 2023793   | 2024101 | 2                 | chrgi:27375111:ref:NC004463.1:_2023718_2024101_2  |
| BJ_NTR_7 | 8                     | 79                                 | HEWTYGQDPYPPSG<br>DAQVLVQGHDR<br>VAVDAAHK<br>FRHEWTYGQDPYPPSG                                                                                                                                                                                                            | 9                  | 2056995   | 2057228 | 3                 | chrgi:27375111:ref:NC004463.1:_2056926_2057228_3  |

|           |    |    |                                                                                                                                                                 |   |         |         |    |                                                           |
|-----------|----|----|-----------------------------------------------------------------------------------------------------------------------------------------------------------------|---|---------|---------|----|-----------------------------------------------------------|
|           |    |    | VAVDAAHKEGK<br>ASVQYFVTR<br>AVDAAHKEGK<br>NCEYSGPYATEEEAIR                                                                                                      |   |         |         |    |                                                           |
| BJ_NTR_8  | 3  | 17 | VDAASLSAAAQQAETDFCR<br>IVCDDAGGEHR<br>ACQAAFK                                                                                                                   | 4 | 2237471 | 2237677 | 2  | chrgi:27375111:ref:NC00<br>4463.1:_2237447_22376<br>77_2  |
| BJ_NTR_9  | 2  | 20 | ALNLGIGLGHQR<br>ALNLGIGLGH                                                                                                                                      | 4 | 2241278 | 2241463 | 2  | chrgi:27375111:ref:NC00<br>4463.1:_2241263_22414<br>63_2  |
| BJ_NTR_10 | 3  | 8  | PAIAQVSQDITVIER<br>SALENLLAHR<br>ALAALTQE                                                                                                                       | 3 | 2274509 | 2274306 | -2 | chrgi:27375111:ref:NC00<br>4463.1:_2274533_22743<br>06_-2 |
| BJ_NTR_11 | 5  | 33 | QREPDGVAEVCVATVPHALHAAVR<br>LAASQCPVAAIR<br>ASADPAPSPAEAER<br>VMVDQDLCGTSGQCVLTLPGTFR<br>VIESDAGDGER                                                            | 5 | 2320513 | 2320803 | 1  | chrgi:27375111:ref:NC00<br>4463.1:_2320324_23208<br>03_1  |
| BJ_NTR_12 | 10 | 39 | AQVETMMAVDK<br>SFELWLISDK<br>APPAPVVDNTNVIR<br>SLGVIGGGEFTAR<br>AFADIVQAWAYR<br>AYTEDHIALAAEYALGTLADDER<br>VGATPEPGK<br>SFELWLISDKLPR<br>KVGATPEPGK<br>PIVWENIR | 6 | 2379763 | 2380854 | 1  | chrgi:27375111:ref:NC00<br>4463.1:_2379673_23808<br>54_1  |
| BJ_NTR_13 | 2  | 4  | LQAQHLSLDR<br>EAEFGLDDAIAALR                                                                                                                                    | 2 | 2555937 | 2556221 | 3  | chrgi:27375111:ref:NC00<br>4463.1:_2555919_25562<br>21_3  |
| BJ_NTR_14 | 3  | 31 | ECADWIYDPAR<br>FAAHYPTDVDK<br>NPYFAAHYPTDVDK                                                                                                                    | 5 | 2557342 | 2557091 | -3 | chrgi:27375111:ref:NC00<br>4463.1:_2557399_25570<br>91_-3 |
| BJ_NTR_15 | 8  | 57 | FPEYRPPASSTN<br>FGGEQTFR<br>MFQLFLR<br>AAVTFGNGDDEYLER<br>RVEDVLAR<br>LKELGASIAHFK                                                                              | 9 | 2559223 | 2559645 | 1  | chrgi:27375111:ref:NC00<br>4463.1:_2559172_25596<br>45_1  |

|           |   |    |                                                                                                                           |   |         |         |    |                                                           |
|-----------|---|----|---------------------------------------------------------------------------------------------------------------------------|---|---------|---------|----|-----------------------------------------------------------|
|           |   |    | IEAIMIAIEDALHAAER<br>EALDNHHQDLFDKEILNGQR                                                                                 |   |         |         |    |                                                           |
| BJ_NTR_16 | 6 | 70 | LQMSADNVADSYAR<br>DRFNGLAAK<br>RLQMSADNVADSYAR<br>QLHTGLMTR<br>TTMEQATAAAK<br>ADADLDVVIR                                  | 8 | 2672918 | 2672562 | -2 | chrgi:27375111:ref:NC00<br>4463.1:_2672924_26725<br>62_-2 |
| BJ_NTR_17 | 7 | 43 | SGSAEELAR<br>AAAGPVIVHTLA<br>DGAVPIISDVGFR<br>IKDGAVPIISDVGFR<br>DLGPLLAGDAR<br>FEQAEANR<br>AIAWIEK                       | 9 | 2674126 | 2674419 | 1  | chrgi:27375111:ref:NC00<br>4463.1:_2674030_26744<br>19_1  |
| BJ_NTR_18 | 4 | 11 | LKDSEAHPPNAK<br>TVLLTGLR<br>SAGVTINHEAAAAGEEPPWS<br>MTDDQVNR                                                              | 4 | 2696071 | 2695853 | -3 | chrgi:27375111:ref:NC00<br>4463.1:_2696248_26958<br>53_-3 |
| BJ_NTR_19 | 6 | 14 | FSDDRLLLVDALAK<br>INASGLELGALVSSTPAAFR<br>VAAVFDVIEPFAR<br>AILQLIGNALLVQQR<br>LTAVSETANALTDIIDTER<br>KLTAVSETANALTDIIDTER | 2 | 2744061 | 2744900 | 3  | chrgi:27375111:ref:NC00<br>4463.1:_2744049_27449<br>00_3  |
| BJ_NTR_20 | 2 | 3  | IHVRPADFPS<br>DVLGEYGR                                                                                                    | 1 | 3511463 | 3511675 | 2  | chrgi:27375111:ref:NC00<br>4463.1:_3511436_35116<br>75_2  |
| BJ_NTR_21 | 2 | 2  | SFDPTAQETLFYPR<br>ELTGAGFTAAFR                                                                                            | 1 | 4280525 | 4280746 | 2  | chrgi:27375111:ref:NC00<br>4463.1:_4280492_42807<br>46_2  |
| BJ_NTR_22 | 3 | 10 | AVVALHPATVDFVK<br>MLRVPLHSVVHFVR<br>VPLHSVVHFVR                                                                           | 1 | 4483397 | 4483708 | 2  | chrgi:27375111:ref:NC00<br>4463.1:_4483370_44837<br>08_2  |
| BJ_NTR_23 | 2 | 10 | FYAPVSYGYGGCYVR<br>RLVPTPWGPR                                                                                             | 1 | 4555782 | 4555531 | -1 | chrgi:27375111:ref:NC00<br>4463.1:_4556379_45555<br>31_-1 |
| BJ_NTR_24 | 1 | 5  | VIAGEQGAQR                                                                                                                | 1 | 4603617 | 4603312 | -1 | chrgi:27375111:ref:NC00<br>4463.1:_4603653_46033<br>12_-1 |

|           |    |    |                                                                      |   |         |         |    |                                                           |
|-----------|----|----|----------------------------------------------------------------------|---|---------|---------|----|-----------------------------------------------------------|
| BJ_NTR_25 | 3  | 4  | AFLQIDGEPVTLAK<br>YSGAGVTLR<br>CADGTQFIVGFYDADKR                     | 2 | 4606004 | 4606330 | 2  | chrgi:27375111:ref:NC00<br>4463.1:_4605953_46063<br>30_2  |
| BJ_NTR_26 | 5  | 47 | GEDVEFIDAK<br>ILVLYGSYR<br>ERGEDVEFIDAK<br>LANFVINR<br>FADDLAWWIEAAK | 9 | 4634660 | 4635250 | 2  | chrgi:27375111:ref:NC00<br>4463.1:_4634651_46352<br>50_2  |
| BJ_NTR_27 | 2  | 4  | VTDRDHNELYR<br>TPLDPVPAWQR                                           | 2 | 4655067 | 4654837 | -1 | chrgi:27375111:ref:NC00<br>4463.1:_4655082_46548<br>37_-1 |
| BJ_NTR_28 | 2  | 3  | YGGHFHAVESNLHETDDL<br>R<br>FVAFEVPLSLAR                              | 1 | 4677230 | 4677526 | 2  | chrgi:27375111:ref:NC00<br>4463.1:_4677206_46775<br>26_2  |
| BJ_NTR_29 | 2  | 2  | NCQVVWR<br>ITLDEDASQLPGVIR                                           | 1 | 4859967 | 4860221 | 3  | chrgi:27375111:ref:NC00<br>4463.1:_4859937_48602<br>21_3  |
| BJ_NTR_30 | 2  | 2  | VVWLDFR<br>YGQGFDSFVCLGEAR                                           | 1 | 5011223 | 5010939 | -2 | chrgi:27375111:ref:NC00<br>4463.1:_5011454_50109<br>39_-2 |
| BJ_NTR_31 | 3  | 4  | LALIELLIEEK<br>LLTEADDEDKR<br>AAMTAHTIATVLR                          | 2 | 5044580 | 5044783 | 2  | chrgi:27375111:ref:NC00<br>4463.1:_5044565_50447<br>83_2  |
| BJ_NTR_32 | 2  | 2  | LGETGYHWYR<br>HGYCWYR                                                | 1 | 5148505 | 5148314 | -3 | chrgi:27375111:ref:NC00<br>4463.1:_5148517_51483<br>14_-3 |
| BJ_NTR_33 | 4  | 11 | ATVLQLPVTQPAGER<br>PAQVGETIVTTTFR<br>YVLVTQLVEGQR<br>HHDAIEFPDGGK    | 4 | 5350358 | 5350789 | 2  | chrgi:27375111:ref:NC00<br>4463.1:_5350217_53507<br>89_2  |
| BJ_NTR_34 | 2  | 4  | QAATDAAIEAAR<br>RYSATYSVDK                                           | 2 | 5550319 | 5550534 | 1  | chrgi:27375111:ref:NC00<br>4463.1:_5550259_55505<br>34_1  |
| BJ_NTR_35 | 2  | 2  | LFPDLDPLEIYR<br>MLANGKEPAAVSLHLAQAK                                  | 1 | 5804755 | 5805027 | 1  | chrgi:27375111:ref:NC00<br>4463.1:_5804737_58050<br>27_1  |
| BJ_NTR_36 | 10 | 46 | AAYVGQDR<br>CYQSAAAYVGQDRR<br>CYQSAAAYVGQDR<br>SYVNPLPYPISYLHN       | 5 | 5865768 | 5866031 | 3  | chrgi:27375111:ref:NC00<br>4463.1:_5865720_58660<br>31_3  |

|           |   |    |                                                                                                                   |   |         |         |    |                                                           |
|-----------|---|----|-------------------------------------------------------------------------------------------------------------------|---|---------|---------|----|-----------------------------------------------------------|
|           |   |    | SYVNPLPYPISYLH<br>TFAYYDGPSTNR<br>ITPGTFAYYDGPSTNR<br>AAAYVGQDR<br>GTFAYYDGPSTNR<br>LHNYGPGITPGTFAYYDGPSTNR       |   |         |         |    |                                                           |
| BJ_NTR_37 | 4 | 9  | YYGGYGPR<br>YYGYGYR<br>PNYYGYYGPR<br>MVCDAWGR                                                                     | 3 | 5866862 | 5867146 | 2  | chrgi:27375111:ref:NC00<br>4463.1:_5866847_58671<br>46_2  |
| BJ_NTR_38 | 3 | 20 | YAGPGVWVDGFR<br>HSQIACTIENY<br>ASPSAIGSCSELVFTCENGR                                                               | 5 | 6031015 | 6031395 | 1  | chrgi:27375111:ref:NC00<br>4463.1:_6030586_60313<br>95_1  |
| BJ_NTR_39 | 3 | 3  | GEIDYFTSAR<br>PPQQTNITSETGGDAAR<br>LRLDPSAVLSLLK                                                                  | 1 | 6503599 | 6503324 | -3 | chrgi:27375111:ref:NC00<br>4463.1:_6503698_65033<br>24_-3 |
| BJ_NTR_40 | 1 | 11 | AGSTPIPSAEAPDR                                                                                                    | 1 | 6676557 | 6676399 | -1 | chrgi:27375111:ref:NC00<br>4463.1:_6676608_66763<br>99_-1 |
| BJ_NTR_41 | 2 | 2  | HRDEIFEK<br>ETIHTHAPGFSDALNR                                                                                      | 1 | 6957326 | 6957547 | 2  | chrgi:27375111:ref:NC00<br>4463.1:_6957239_69575<br>47_2  |
| BJ_NTR_42 | 5 | 11 | AVDDAGYR<br>VTVANACQR<br>LKECLSR<br>SCGAEIVANCR<br>ETMSFGDSIGLLAK                                                 | 4 | 7228018 | 7228434 | 1  | chrgi:27375111:ref:NC00<br>4463.1:_7227739_72284<br>34_1  |
| BJ_NTR_43 | 7 | 52 | WDNTGICQVWNEDLK<br>VSKPLPTFTAASDLQIK<br>YKPFQWGASTYK<br>VSKPLPTFTAASDL<br>PLPTFTAASDLQIK<br>FTAASDLQIK<br>APSYVIR | 6 | 7342072 | 7342332 | 1  | chrgi:27375111:ref:NC00<br>4463.1:_7341541_73423<br>32_1  |
| BJ_NTR_44 | 3 | 8  | GAAGAQQPVGPPGPPGPPGPR<br>AGPAGKPGPQGK<br>QGEPGRPGPQGHPR                                                           | 3 | 7346137 | 7346655 | 1  | chrgi:27375111:ref:NC00<br>4463.1:_7346110_73466<br>55_1  |
| BJ_NTR_45 | 4 | 10 | ALGQIATGQVDVADDQVK<br>VQVVLPWLLQR<br>FAEMAQATIR                                                                   | 3 | 7467885 | 7467568 | -1 | chrgi:27375111:ref:NC00<br>4463.1:_7467894_74675<br>68_-1 |

|           |   |    |                                                                                                                            |   |         |         |    |                                                           |
|-----------|---|----|----------------------------------------------------------------------------------------------------------------------------|---|---------|---------|----|-----------------------------------------------------------|
|           |   |    | AAASIPVMQVEEER                                                                                                             |   |         |         |    |                                                           |
| BJ_NTR_46 | 8 | 15 | NILLGASYGSLGTK<br>LRDEAVHR<br>AVASGAPFIER<br>LGADPQDQVPFAK<br>TVETVDQK<br>AAESLLKPSSAAR<br>VFDSLFPVPLAK<br>LISHQLGVPNPEIDR | 3 | 7585057 | 7586121 | 1  | chrgi:27375111:ref:NC00<br>4463.1:_7584841_75861<br>21_1  |
| BJ_NTR_47 | 3 | 9  | RKPEPAAEADADAA<br>SLYESEAFPLPR<br>FDQNGIR                                                                                  | 3 | 7761226 | 7761519 | 1  | chrgi:27375111:ref:NC00<br>4463.1:_7761139_77615<br>19_1  |
| BJ_NTR_48 | 3 | 6  | CSVAAALALR<br>ADPETPGTNQGPVTISSSSSER<br>QGGQQPTTEEIPAMK                                                                    | 2 | 8015277 | 8014960 | -1 | chrgi:27375111:ref:NC00<br>4463.1:_8015292_80149<br>60_-1 |
| BJ_NTR_49 | 8 | 34 | LILAEPAPGVR<br>YSEDEITAR<br>DVMALLGFGLR<br>DALIGLISTALSDYR<br>LVLGDILQPNVGMFR<br>AAGFAVQR<br>AHTNIGHNR<br>LSDYRQLR         | 7 | 8111311 | 8112012 | 1  | chrgi:27375111:ref:NC00<br>4463.1:_8111251_81120<br>12_1  |
| BJ_NTR_50 | 4 | 6  | IGDDAAESHAFER<br>FALETTR<br>SAENYADDLR<br>SDGTNWDPR                                                                        | 2 | 8451525 | 8451806 | 3  | chrgi:27375111:ref:NC00<br>4463.1:_8451501_84518<br>06_3  |
| BJ_NTR_51 | 2 | 2  | AMLIYMKPDLIAEAK<br>AWQFIEK                                                                                                 | 1 | 8867734 | 8867919 | 1  | chrgi:27375111:ref:NC00<br>4463.1:_8867698_88679<br>19_1  |
| BJ_NTR_52 | 1 | 6  | VTPLSQELPAHSR                                                                                                              | 1 | -       | 1698438 | 1  | chrgi:27375111:ref:NC00<br>4463.1:_1698235_16984<br>38_1  |
| BJ_NTR_53 | 2 | 2  | MHTAAEQSGVIDR<br>VLLVHHVEGQCR                                                                                              | 1 | -       | 2207542 | -1 | chrgi:27375111:ref:NC00<br>4463.1:_2207895_22075<br>42_-1 |
| BJ_NTR_54 | 2 | 2  | GFAIPAGLGGNWK<br>NDLLVVPR                                                                                                  | 1 | -       | 2239850 | 3  | chrgi:27375111:ref:NC00<br>4463.1:_2239560_22398<br>50_3  |

|           |   |    |                                                                     |   |   |         |    |                                                   |
|-----------|---|----|---------------------------------------------------------------------|---|---|---------|----|---------------------------------------------------|
| BJ_NTR_55 | 1 | 9  | FEFEIEIR                                                            | 1 | - | 302362  | -1 | chrgi:27375111:ref:NC004463.1:_302817_302362_-1   |
| BJ_NTR_56 | 2 | 36 | LASYIDVKR<br>ASYIDVKR                                               | 5 | - | 3859456 | -1 | chrgi:27375111:ref:NC004463.1:_3859827_3859456_-1 |
| BJ_NTR_57 | 4 | 35 | KPATVFVDGGSGTTGLGINER<br>ETVALIDSMGPGPK<br>VLDASTAYR<br>LKLQSDVAVK  | 9 | - | 4819223 | 3  | chrgi:27375111:ref:NC004463.1:_4817820_4819223_3  |
| BJ_NTR_58 | 4 | 15 | SIDDFISVWPLGHQDK<br>VWVPDDQLIQSEER<br>RSIDDFISVWPLGHQDK<br>TTLVELPR | 3 | - | 5552603 | -3 | chrgi:27375111:ref:NC004463.1:_5552938_5552603_-3 |
| BJ_NTR_59 | 2 | 8  | DTVTLPAIALIDER<br>AAGGDDAAPKPK                                      | 2 | - | 5668821 | 1  | chrgi:27375111:ref:NC004463.1:_5668441_5668821_1  |
