# Supplementary material
Source: PubMed Central journal article supplement (PMC3820949)
Supplement: supp_M112.027169_mcp.M112.027169-12.pdf [file supp_M112.027169_mcp.M112.027169-12.pdf]

**Supplementary Table 2: Genome identity matrix. Genomes are compared using dnadiff tool of MUMmer package.**

| <b>Genome Accession</b> | <b>Organism</b>                         | <b>% Coverage of B. japonicum USDA110 genome (M-M Alignments)</b> | <b>Average identity</b> | <b>% Coverage of query genome (M-M Alignments)</b> |
|-------------------------|-----------------------------------------|-------------------------------------------------------------------|-------------------------|----------------------------------------------------|
| NC_017325.1             | <i>Sinorhizobium meliloti</i> SM11      | 1.06                                                              | 83.36                   | 2.48                                               |
| NC_002678               | <i>Mesorhizobium loti</i>               | 2.37                                                              | 83.26                   | 3.07                                               |
| NC_007406.1             | <i>Nitrobacter winogradskyi</i>         | 5.53                                                              | 84.01                   | 14.82                                              |
| NC_011386.1             | <i>Oligotropha carboxidovorans</i>      | 6.32                                                              | 84.01                   | 15.35                                              |
| NC_007964.1             | <i>Nitrobacter hamburgensis</i>         | 8.56                                                              | 84.34                   | 17.70                                              |
| NC_008380.1             | <i>Rhizobium leguminosarum</i>          | 12.96                                                             | 83.04                   | 23.34                                              |
| NC_011004.1             | <i>Rhodopseudomonas palustris</i> TIE-1 | 13.12                                                             | 84.26                   | 20.81                                              |
| NC_009485               | <i>Bradyrhizobium sp. BTAi</i>          | 23.50                                                             | 84.86                   | 25.90                                              |
| NC_009445.1             | <i>Bradyrhizobium sp. ORS 278</i>       | 24.24                                                             | 84.98                   | 29.60                                              |
| NC_017082.1             | <i>Bradyrhizobium sp. S23321</i>        | 59.65                                                             | 89.35                   | 75.01                                              |
| NC_017249.1             | <i>Bradyrhizobium japonicum</i> USDA6   | 74.71                                                             | 91.04                   | 73.88                                              |
